1 **Sulfoquinovosyl diacylglycerol is required for dimerization of the *Rhodobacter sphaeroides* RC-LH1 core**  
2 **complex**

3 Elizabeth C. Martin<sup>1</sup>, Adam G.M. Bowie<sup>1</sup>, Taylor Welfare Reid<sup>1,3</sup>, C. Neil Hunter<sup>1</sup>, Andrew Hitchcock<sup>1,\*</sup> and  
4 David J.K. Swainsbury<sup>2,\*</sup>

5 <sup>1</sup>Plants, Photosynthesis and Soil, School of Bioscience, University of Sheffield, Sheffield, UK.

6 <sup>2</sup>School of Biological Sciences, University of East Anglia, Norwich, UK.

7 <sup>3</sup>Present address: Centre for Bacterial Cell Biology, Newcastle University, Newcastle, UK.

8 \*Corresponding authors: Andrew Hitchcock ([a.hitchcock@sheffield.ac.uk](mailto:a.hitchcock@sheffield.ac.uk)) and David J.K. Swainsbury  
9 ([d.swainsbury@uea.ac.uk](mailto:d.swainsbury@uea.ac.uk))

10 **Author ORCID IDs:** 0000-0001-9600-7298 (ECM); 0009-0008-6246-4544 (AGMB); 0000-0001-9335-3080  
11 (TWR); 0000-0003-2533-9783 (CNH); 0000-0001-6572-434X (AH); 0000-0002-0754-0363 (DJKS)

12

13 **Abstract:** The reaction centre-light harvesting 1 (RC-LH1) core complex is indispensable for anoxygenic  
14 photosynthesis. In the purple bacterium *Rhodobacter (Rba.) sphaeroides* RC-LH1 is produced both as a  
15 monomer in which 14 LH1 subunits form a crescent-shaped antenna around one RC, and as a dimer, where  
16 28 LH1 subunits form an S-shaped antenna surrounding two RCs. The PufX polypeptide augments the five RC  
17 and LH subunits, and in addition to providing an interface for dimerization, PufX also prevents LH1 ring  
18 closure, introducing a channel for quinone exchange that is essential for photoheterotrophic growth.  
19 Structures of *Rba. sphaeroides* RC-LH1 complexes revealed several new components; protein-Y, which helps  
20 to form a quinone channel; protein-Z, of unknown function but which is unique to dimers; and a tightly bound  
21 sulfoquinovosyl diacylglycerol (SQDG) lipid that interacts with two PufX arginines. This lipid lies at the dimer  
22 interface alongside weak density for a second molecule, previously proposed to be an ornithine lipid. In this  
23 work we have generated strains of *Rba. sphaeroides* lacking protein-Y, protein-Z, SQDG or ornithine lipids to  
24 assess the roles of these previously unknown components in the assembly and activity of RC-LH1. We show  
25 that whilst the removal of either protein-Y, protein-Z or ornithine lipids has only subtle effects, SQDG is  
26 essential for the formation of RC-LH1 dimers but its absence has no functional effect on the monomeric  
27 complex.

28

29 **Introduction**

30 The purple phototrophic bacterium *Rhodobacter (Rba.) sphaeroides* contains hundreds of specialised  
31 chromatophore vesicles, around 50 nm in diameter, the numbers of which respond to the incident light

32 intensity [1–3]. The major membrane complexes of the chromatophore comprise the reaction centre-light  
33 harvesting 1 (RC-LH1) core complex, the peripheral light harvesting 2 (LH2) antenna complex, the cytochrome  
34 (cyt) *bc*<sub>1</sub> complex, and ATP synthase [4]. Of these, cryogenic electron microscopy (cryo-EM) structures of cyt  
35 *bc*<sub>1</sub> [5], LH2 [6] and both the monomeric and dimeric forms of RC-LH1 [7–10] have recently been determined.  
36 Within the chromatophore, LH2 complexes each bind a circular array of bacteriochlorophyll (BChl) and  
37 carotenoid pigments that absorb light and transfer the energy via the LH1 complex to the RC, where the  
38 energy is transiently stored as a charge separation [11–13]. Light-driven reduction of quinone to quinol at  
39 the RC is followed by passage of quinol across the LH1 ring [13] and diffusion to a cyt *bc*<sub>1</sub> complex, where the  
40 quinol is oxidised through operation of the Q-cycle [14–16]. The cyt *bc*<sub>1</sub> complexes reside in locally lipid-rich  
41 domains [4,17] located within a few nm of the RC-LH1 complexes [18]. The catalytic mechanism of the cyt  
42 *bc*<sub>1</sub> complex reduces cytochrome *c*<sub>2</sub> [11,19], which returns to the photo-oxidised RC, completing the cyclic ET  
43 pathway [11,20]; the Q-cycle mechanism also releases protons into the chromatophore lumen, generating a  
44 proton-motive force that is utilised by ATP synthase to drive the production of ATP to power cellular  
45 metabolism [20,21].

46 In *Rba. sphaeroides*, the RC is comprised of 3 subunits (L, H and M) and is surrounded in a fixed stoichiometry  
47 by a crescent-shaped LH1 ring containing 14 pairs of  $\alpha$  and  $\beta$  transmembrane polypeptides, each of which  
48 binds two BChls and two carotenoids [7–10,22,23]. Closure of the LH1 ring is prevented by a single copy of  
49 the PufX subunit, which precludes the insertion of further LH1 subunits to maintain the open complex [7–  
50 10,24–28]. One copy of the recently discovered protein-Y subunit (using the naming convention suggested  
51 by Swainsbury *et al* [29]) sits between the RC and the LH1 ring, creating the RC<sub>3</sub>-LH1<sub>14</sub>-XY complex and  
52 maintaining a separation that allows quinones and quinols to diffuse freely to and from the RC Q<sub>B</sub> site.

53 In purple bacteria most RC-LH1 complexes are monomeric, some with a closed LH1 ring as in *Rhodospirillum*  
54 *rubrum* [30] and *Thermochromatium (Tch.) tepidum* [31] and others with an incomplete ring - held open by  
55 extra scaffolding subunits such as PufX (*Rba. veldkampii*) [32], protein W (*Rhodopseudomonas palustris*) [33–  
56 35], or by the insertion of a transmembrane helix associated with the cytochrome subunit (*Roseiflexus*  
57 *castenholzii*) [36,37]. The many structural variations of RC-LH1 complexes are reviewed in [13]. In this  
58 context, RC-LH1 complexes in *Rba. sphaeroides* are unusual because they form dimers in which 28 LH1  
59 subunits form an S-shaped assembly around two RCs, which creates a seamless path for energy transfer  
60 between the two halves of the complex. This arrangement provides an elegant energy-conservation  
61 mechanism that allows an LH1 excited state access to a second RC if the first is already undergoing a charge  
62 separation [38,39]. In addition, the dimeric complex is bent with the two monomers held at an angle of 152°  
63 [7–10], which imposes curvature on the membranes and is partly responsible for the spherical shape of the  
64 chromatophore vesicles [1,8–10,23,40–43]. This property is unique to a few close relatives of *Rba.*  
65 *sphaeroides*, which were recently reclassified into the *Cereibacter* genus [44]. To ensure consistency with the  
66 previous literature we will refer to these species as belonging to the *Cereibacter* subgroup and continue to

67 use the historical species names for *Rba. sphaeroides* and its relatives throughout this manuscript. Mutants  
68 of *Rba. sphaeroides* that lack PufX are not only unable to grow photoheterotrophically but no longer form  
69 dimers [17,32–35,45,46].

70 Recent cryo-EM structures of the monomeric and dimeric forms of *Rba. sphaeroides* RC-LH1 have revealed  
71 further components in the complex beyond PufX. Protein-Y forms a hydrophobic hairpin structure that lies  
72 between the inside surface of LH1 $\alpha$  13 and 14 and the RC. Genetic removal of protein-Y (also called protein  
73 U) results in the formation of an incomplete LH1 ring with as few as 11  $\alpha$  and 10  $\beta$  subunits [9,10]. This  
74 suggests that in addition to promoting the access of quinones to the RC Q<sub>B</sub> site, protein-Y also provides a  
75 binding site for the LH1 subunits at the edge of the LH1 array, ensuring a gap that is correctly positioned to  
76 facilitate rapid diffusion of quinone and quinol between the RC and the external quinone pool. Four copies  
77 of a second novel transmembrane polypeptide, protein-Z, were also identified in the dimeric structure, but  
78 are absent in the monomer, suggesting an as yet undetermined role unique to the dimer [8]. The dimeric  
79 structure also revealed the presence of two lipids, the first of which was confidently assigned as  
80 sulfoquinovosyl diacylglycerol (SQDG) based on clear density of its distinctly shaped sulfonic acid head group.  
81 The other lipid was less well defined but was proposed to be an ornithine lipid [8]. The SQDG lipid was found  
82 to bridge the two halves of the dimer, interacting with both the RC L subunit and the critical Arg49 and Arg53  
83 residues of PufX in one monomer, and an LH1  $\beta$  subunit in the other (Fig.1 A-C). This interaction would explain  
84 why mutation of either Arg49 or Arg53 to Lys disrupts dimer formation [47] as this would prevent the  
85 interaction between SQDG and PufX that appears to hold the two monomers together.

86 In this study we investigate the roles of SQDG, ornithine lipids, and the newly identified Y and Z subunits of  
87 the RC-LH1 complex by generating a series of mutants deficient in synthesis of specific lipids or lacking the  
88 genes that encode protein-Y or protein-Z. The effects of these mutations on RC-LH1 dimerization, RC activity  
89 and photoheterotrophic growth have been characterised, providing new insights into these recently  
90 identified components of the RC-LH1 core complex.

91

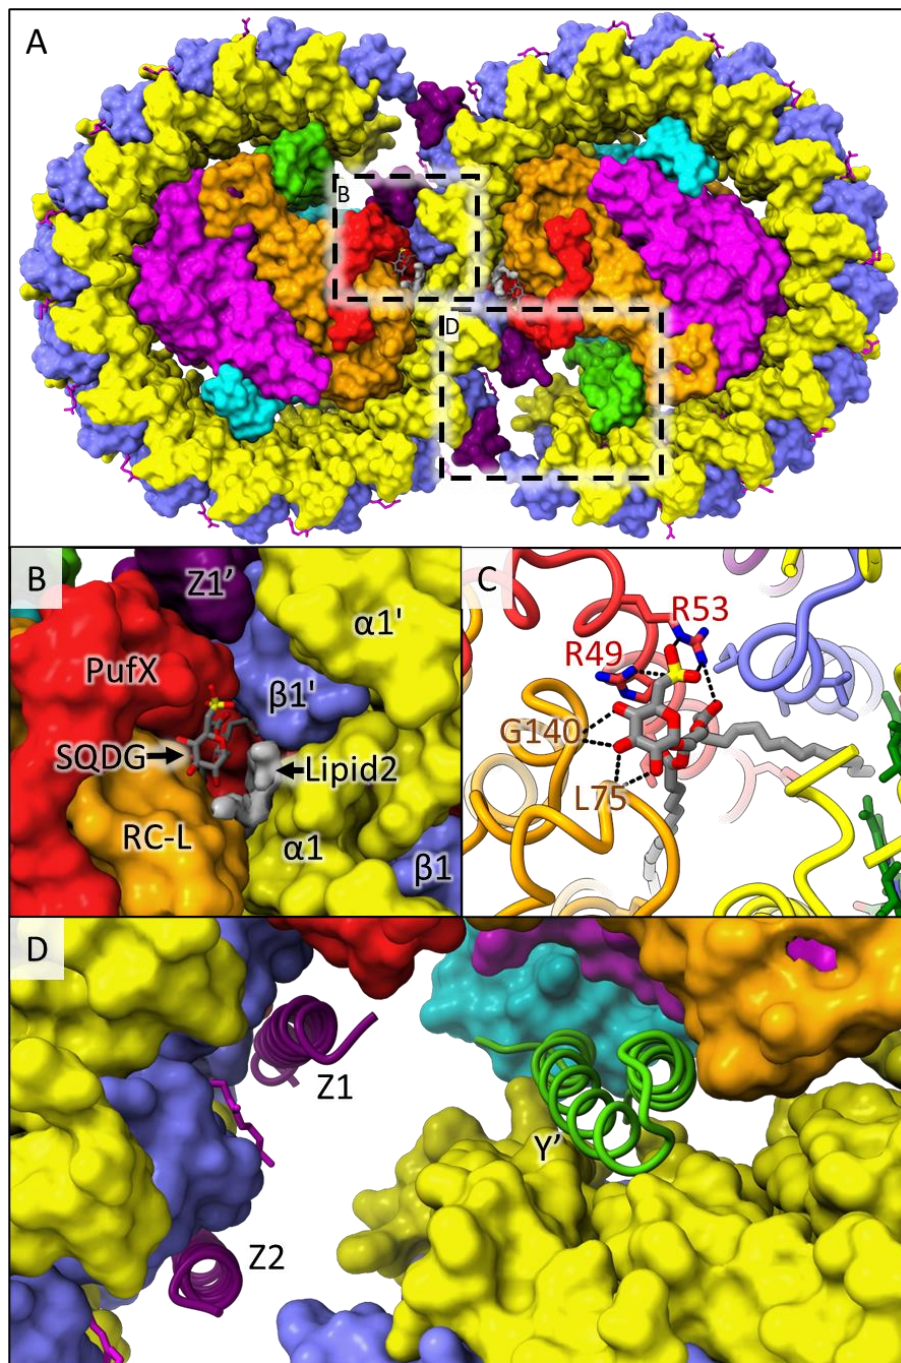

92

93 **Figure 1. Structure of the dimeric *Rba. sphaeroides* RC-LH1 core complex.** (A) Surface view of the complete  
94 complex from the luminal (periplasmic) face. The RC subunits are shown in orange (RC-L), magenta (RC-M)  
95 and cyan (RC-H). LH1 subunits are in yellow ( $\alpha$ ) and blue ( $\beta$ ). Additional subunits are in red (PufX), green  
96 (protein-Y) and purple (protein-Z). Lipids and cofactors are shown in stick representation in green (BChl),  
97 magenta (carotenoids) and grey (SQDG). Unassigned density for lipid 2 is shown as a grey surface. Boxes  
98 illustrate areas enlarged in panels B, C and D. (B) Enlarged view highlighting one of the SQDGs and lipid 2  
99 bound at the dimer interface. The subunits from the left monomer (PufX, RC-L,  $\alpha 1$  and  $\beta 1$ ), and those from  
100 the right monomer ( $\alpha 1'$ ,  $\beta 1'$  and  $Z1'$ ) are labelled. (C) A further enlarged view of the SQDG lipid with the  
101 protein in ribbon representation. Hydrogen bonds between the SQDG head group and PufX Arg49 and Arg53,  
102 and the backbone of RC-L residues Leu75 and Gly140 are shown. (D) Enlarged view of the two protein-Z  
103 subunits bound to the left monomer (Z1 and Z2, purple) and protein-Y of the right monomer (Y', green) in  
104 ribbon representation. The rest of the protein is in surface representation.

105



## 106 **Materials and Methods**

### 107 **Generation of strains and plasmids**

108 The strains used in this study are detailed in Table 1, primer sequences are provided in Table S1, and plasmid  
109 information is given in Table S2. Genomic modifications were made using the pK18mobsacB plasmid as  
110 previously described [48]. Briefly, the target genes were deleted by amplifying ~400 bp regions upstream and  
111 downstream of each gene and joining them by overlap extension PCR, yielding a sequence lacking most of  
112 the coding region but leaving the start and stop codons intact and in frame to guard against interference with  
113 downstream genes upon genomic modification. The resulting PCR fragments were digested with EcoRI and  
114 HindIII and ligated into pK18mobsacB cut with the same restriction enzymes. The resulting sequence-verified  
115 plasmids were transformed into *E. coli* S17-1 and then conjugated into either wild-type or  $\Delta crtA$  *Rba.*  
116 *sphaeroides*. Correctly modified strains were isolated following sequential selection with kanamycin (30  
117  $\mu\text{g}/\text{ml}$ ) and counter-selection with sucrose (10% w/v) and the modified loci were verified by PCR and  
118 automated Sanger sequencing (Eurofins Genomics).

119 Expression plasmids were generated by amplifying fragments containing *sqdB* or *sqdBDC* with HindIII and  
120 BcuI restriction sites. The digested PCR products were ligated into a modified pBBRBB-*Ppuf*<sub>843-1200</sub> plasmid in  
121 which the *puf* promoter-DsRED fragment was replaced with the *pucBAC* genes and 364 bp upstream of *pucB*,  
122 corresponding to the *puc* promoter (*Ppuc*). A HindIII site was engineered immediately downstream of *Ppuc*  
123 such that *pucBAC* could be replaced with a gene of interest by HindIII-BcuI digestion. The *sqdB* and *sqdBDC*  
124 plasmids were conjugated into the  $\Delta sqdB$  strain with selection on kanamycin-containing plates, followed by  
125 screening of the genomic *sqdB* locus and the gene(s) in the plasmid by PCR.

126

127 **Table 1. Bacterial strains used in this study.**

| Species                               | Description                                                                                     | Source/reference                        |
|---------------------------------------|-------------------------------------------------------------------------------------------------|-----------------------------------------|
| <b><i>Escherichia coli</i></b>        |                                                                                                 |                                         |
| JM109                                 | Cloning strain for generating plasmid constructs                                                | Promega, UK                             |
| S17-1                                 | Conjugative strain for transfer of plasmids to <i>Rba. sphaeroides</i>                          | Simon et al 1983                        |
| <b><i>Rhodobacter sphaeroides</i></b> |                                                                                                 |                                         |
| Wild type                             | Strain 2.4.1                                                                                    | S. Kaplan*                              |
| $\Delta crtA$                         | Unmarked deletion of <i>crtA</i> (Rsp_0272); carotenoid pathway truncated at spheroidene        | Chi et al 2015 [49]                     |
| $\Delta puyA$                         | Unmarked deletion of <i>puyA</i> (Rsp_7571); does not produce protein-Y                         | This study; Qian et al 2021a [7]        |
| $\Delta puzA$                         | Unmarked deletion of <i>puzA</i> (orf located within Rsp_2385 gene); does not produce protein-Z | This study; Qian et al 2021b [8]        |
| $\Delta olsBA$                        | Unmarked deletion of <i>olsBA</i> (Rsp_3826-3827); does not make ornithine lipids               | This study; Aygun-Sunar et al 2006 [50] |

|                     |                                                                                                                                                                                |                                              |
|---------------------|--------------------------------------------------------------------------------------------------------------------------------------------------------------------------------|----------------------------------------------|
| <i>ΔsqdB</i>        | Unmarked deletion of <i>sqdB</i> (Rsp_2569); does not make SQDG                                                                                                                | This study; Benning and Somerville 1992 [51] |
| <i>ΔcrtA ΔpuyA</i>  | Unmarked deletion of <i>puyA</i> from <i>ΔcrtA</i> background                                                                                                                  | This study                                   |
| <i>ΔcrtA ΔpuzA</i>  | Unmarked deletion of <i>puzA</i> from <i>ΔcrtA</i> background                                                                                                                  | This study                                   |
| <i>ΔcrtA ΔolsBA</i> | Unmarked deletion of <i>olsBA</i> from <i>ΔcrtA</i> background                                                                                                                 | This study                                   |
| <i>ΔcrtA ΔsqdB</i>  | Unmarked deletion of <i>sqdB</i> from <i>ΔcrtA</i> background                                                                                                                  | This study                                   |
| <i>ΔcycA Δcycl</i>  | Unmarked deletion of <i>cycA</i> (Rsp_0296) and <i>cycl</i> (Rsp_2577); does not produce cytochrome <i>c</i> <sub>2</sub> (CycA) or isocytochrome <i>c</i> <sub>2</sub> (Cycl) | This study                                   |

128 \*Department of Microbiology and Molecular Genetics, The University of Texas Medical School, Houston, TX  
129 77030, U.S.A.

130

### 131 **Cell growth and preparation of intracytoplasmic membranes**

132 *Rba. sphaeroides* cells were grown photoheterotrophically in 1 L Roux bottles containing M22 medium [52]  
133 under ~50 μmol m<sup>-2</sup> s<sup>-1</sup> illumination from 70 W Phillips Halogen Classic bulbs until they reached stationary  
134 phase (an optical density at 680 nm [OD<sub>680</sub>] of ~3). Strains containing pBBRBB plasmids were supplemented  
135 with 30 μg ml<sup>-1</sup> kanamycin. Cells were harvested by centrifugation at 4,000 RCF for 30 min at 4 °C then  
136 resuspended in 5 mL 20 mM Tris-HCl pH 8. Following addition of a few crystals of DNaseI and lysozyme, cells  
137 were disrupted via two passes through a chilled French press at 18,000 psi followed by removal of unbroken  
138 cells and insoluble debris by centrifugation at 25,000 RCF for 30 min at 4 °C. The supernatant was layered on  
139 top of 15/40% (w/v) discontinuous sucrose gradients and centrifuged at 85,000 RCF in a Beckman Type 45 Ti  
140 rotor at 4°C for 10 h. A pigmented band of ICM formed at the 15/40% interface, which was harvested using  
141 a serological pipette and stored at -20°C until required.

### 142 **Thin-layer chromatography (TLC) of lipids**

143 TLC was performed based on a method by Swainsbury et al [17] with some modifications. TLC plates were  
144 activated by soaking in 0.15 M ammonium sulphate for 15 min and placed in an oven at 160 °C for 1 h. 30 μl  
145 volumes of membrane fractions, at an optical density at 875 nm (OD<sub>875</sub>) of 10 were dissolved in 100 μL of  
146 50:50 methanol:chloroform, centrifuged in a benchtop microcentrifuge at 16,000 RCF for 5 min and the lower  
147 chloroform phase was removed. 5-10 μl of each lipid standard (~5 mg mL<sup>-1</sup> in chloroform) and membrane  
148 samples were loaded on to the TLC plate and run in 85:15:10:3.5 chloroform:methanol:acetic acid:water for  
149 45 min. The plate was dried for 5 min before being submerged in 50% (v/v) H<sub>2</sub>SO<sub>4</sub> for 10-20 s and dried, prior  
150 to heating at 160 °C for 10 min to develop the lipid bands.

### 151 **Fractionation of photosynthetic complexes by rate-zonal centrifugation**

152 Membranes harvested from discontinuous sucrose gradients were diluted at least 5-fold in 20 mM Tris, pH 8  
153 and pelleted at 185,000 RCF for 2 h using a Beckman Type 45 Ti rotor at 4 °C. Pelleted membranes were

154 resuspended in approximately 100–200  $\mu\text{L}$  of 20 mM Tris pH 8. Six  $\text{OD}_{875}$  units of resuspended membranes  
155 were solubilised in 3% (w/w) n-dodecyl- $\beta$ -D-maltoside ( $\beta$ -DDM) in a total volume of 375  $\mu\text{L}$  for 1 h at room  
156 temperature before centrifugation at 15,000 rpm at 4  $^{\circ}\text{C}$  for 1 h in a microcentrifuge. The supernatant was  
157 collected and layered on top of discontinuous sucrose gradients containing steps of 20, 21.25, 22.5, 23.75  
158 and 25% (w/w) sucrose in 20 mM Tris-HCL pH8 and 0.03% (w/v)  $\beta$ -DDM. Gradients were centrifuged in a  
159 Beckman SW41 Ti rotor at 125,000 RCF for 40 h at 4  $^{\circ}\text{C}$ . Each gradient was performed in technical triplicate  
160 from two biological repeats. Pigmented bands were harvested with a peristaltic pump for downstream  
161 processing. If being used for turnover assays, RC-LH1 monomer and dimer bands were buffer exchanged into  
162 50 mM Tris at pH 7.5 with 100 mM NaCl and 0.03% w/v  $\beta$ -DDM by spin concentration with 50,000 MWCO  
163 centrifugal concentrators (Sartorius).

164 To attempt to reform RC-LH1 dimers from monomers of the  $\Delta\text{sqdB}$  strain by provision of SQDG, the monomer  
165 band harvested from a discontinuous sucrose gradient of the  $\Delta\text{sqdB}$  strain was concentrated to 500  $\mu\text{L}$  in a  
166 50,000 MWCO centrifugal concentrator (Sartorius). This sample was split and incubated with and without  
167 0.05% (w/v) SQDG for 24 h before application to another discontinuous sucrose gradient, as described above.

## 168 **Bioinformatics**

169 Homologues of PufX, protein-Y, protein-Z and the SQDG producing enzyme SqdB were identified by  
170 performing tblastn (protein to translated nucleotide) searches against the whole genome contigs (wgs)  
171 database on the NCBI BLAST webserver (<https://blast.ncbi.nlm.nih.gov/Blast.cgi>). Search parameters were  
172 calibrated using PufX as a benchmark, which is known to be highly divergent, and were complicated by its  
173 short sequence. The settings used to provide positive hits to all PufX proteins in the target species were:  
174 Expect threshold = 20; Word size = 2; Max matches in a query range = 0 (default); Matrix BLOSUM62 (default);  
175 Gap Costs = Existence: 11, Extension: 1 (default); Compositional adjustments = No Adjustment; Filter Low  
176 complexity regions = off. Searches were performed using the *Rba. sphaeroides* PufX sequence as a template  
177 (UniProt entry P13402) against each species individually. Top scoring hits for each species were verified by  
178 viewing relevant UniProt entries for each sequence, which were annotated as PufX in all cases. Next, searches  
179 for LH2  $\alpha$  (UniProt entry Q3J144), protein-Y (UniProt entry U5NME9), the resolved sequence of protein-Z  
180 extracted from PDB entry 7PQD, and SqdB (UniProt entry Q3J3A8) were performed using the same settings  
181 as for PufX. The top scoring hits from each species were verified by manually inspecting the genomes in the  
182 KEGG database (<https://www.genome.jp/kegg/>) or GENBANK, rejecting sequences embedded within larger  
183 genes or in unrelated genomic regions. LH2 hits were also verified via previous experimental determination  
184 of LH2 production in these species. A phylogenetic tree of 16S rRNA sequences was generated via a  
185 nucleotide BLAST of the *Rba. sphaeroides* 16S RNA (Genbank entry KF791043.1) against the whole genome  
186 contigs (wgs) database for all species analysed in this study, and the non-photosynthetic  
187 alphaproteobacterium *Caulobacter vibrioides* as an outgroup to root the tree. The tree was rendered using

188 FigTree v1.44 (available at <http://tree.bio.ed.ac.uk/software/figtree/>) following flipping of some nodes to  
189 sort species by whether they form RC-LH1 dimers. We noted that *puyA* was located near to *otsB* (encoding  
190 trehalose-phosphatase) in the genome of the species that have this gene. Whole genome shotgun sequences  
191 of *Rba. changlensis* were searched manually for an ORF resembling *puyA* in the vicinity of *otsB*. The sequence  
192 in supplementary Figure 6 was found in *Rba. changlensis* strain DSM 18774 NCBI Reference Sequence:  
193 NZ\_QKZS01000001.1.

#### 194 **Purification of *Rba. sphaeroides* cytochrome $c_2$**

195 A cytochrome  $c_2$  overproduction strain was constructed by expressing *cycA* under the control of the  
196 constitutive *Ppuf*<sub>842-1200</sub> promoter on the pBBRBB plasmid in a strain lacking the genomic copies of *cycA* and  
197 *cycl*. Cell pellets from semi-aerobic cultures (1.6 L of media in 2.5 L conical flasks shaken at 180 rpm at 34 °C)  
198 were resuspended in periplasmic extraction buffer (100 mM Tris-HCl pH 8, 500 mM sucrose and 50 mM NaCl)  
199 supplemented with a tablet of EDTA-free protease inhibitor (Merck) up to a total volume of 40 mL. 0.8 g of  
200 solid sodium deoxycholate (Sigma) was added to the cell resuspension and, after an hour of incubation at 4  
201 °C in the dark, spheroplasts were pelleted at 30,000 RCF for 30 minutes. The supernatant was transferred to  
202 a fresh centrifuge tube and 6.25 mL of deoxycholate precipitation solution (1 M Ammonium acetate at pH 5,  
203 250 mM MgSO<sub>4</sub>) added, before the precipitate was removed by an identical centrifugation step. The  
204 supernatant from this second spin step was subsequently passed through 2 0.22µm filters (Sartorius) and  
205 made up to 500 ml with 50 mM ammonium acetate buffer at pH 5 before loading onto a 30 mL SP Sepharose  
206 column (Cytiva). Cation exchange was performed to purify the cytochrome using a gradient of 13 – 23% buffer  
207 B (50 mM ammonium acetate, 1M NaCl).

#### 208 **RC-LH1 turnover assays**

209 Turnover assays were conducted under steady state conditions in a similar fashion to that described in  
210 Swainsbury et al., (2021) [23], using 300 µl solutions containing 5 µM reduced cytochrome  $c_2$ , 50 µM  
211 ubiquinone-2 (Merck) and 0.01-0.05 µM RC-LH1 in a buffer mixture containing 50 mM Tris, 100 mM NaCl, 1  
212 mM sodium-D ascorbate and 0.03 % w/v β-DDM. Following overnight dark adaption, 300 µL of each reaction  
213 mixture were placed in a quartz cuvette and monitored at 550 nm using a Cary60 spectrophotometer (Agilent  
214 technologies). After 10 seconds, excitation energy was delivered via a fibre optic cable from an 880 nm  
215 M810F2 LED (light-emitting diode) (Thorlabs Ltd., UK) driven at 100% intensity using a DC2200 controller  
216 (Thorlabs Ltd., UK). The data were processed by fitting the linear initial rate over 0.025-0.1 seconds, starting  
217 from the first data point where the absorbance started dropping continuously. Rates were normalised to  $e^-$   
218 /RC/sec by dividing the cyt  $c_2$  oxidation rate per second by the RC-LH1 concentration. The concentrations of  
219 the RC-LH1 complexes were determined using an extinction coefficient of 3,000 mM<sup>-1</sup> [53], except for the  
220 monomeric  $\Delta puyA$  complex, which we predicted to have an extinction coefficient of 2835 mM<sup>-1</sup> based upon  
221 spectra normalised to the RC bacteriopheophytin band in Fig.3.



## 222 **Results**

### 223 **Generation and verification of strains lacking SQDG and ornithine lipids**

224 As shown in Fig. 2A, SQDG synthesis from UDP-glucose requires four enzymes: SqdB, SqdA, SqdC and SqdD  
225 [51]; we deleted the *sqdB* (Rsp\_2569) gene from the *sqdBDC* operon to prevent the first step of SQDG  
226 biosynthesis (Fig. 2C). By contrast, just two enzymes, OlsA and OlsB, are required to produce ornithine lipids  
227 from L-ornithine [50] (Fig. 2B). The *olsB* (Rsp\_3826) and *olsA* (Rsp\_3827) genes are arranged into an operon  
228 in which the 3' end of *olsB* and the 5' end of *olsA* overlap (Fig. 2D); this gene pair was deleted to prevent  
229 ornithine lipid production.

230 Previous work has shown that the deletion of *crtA* influences the levels of RC-LH1 dimer formation [49]. We  
231 therefore deleted *sqdB* and *olsBA* in both a wild-type background and in a strain lacking the spheroidene  
232 monooxygenase ( $\Delta crtA$ ) to better visualise any effect of lipid content on the monomer-dimer ratio (Fig. 3 A-  
233 B). TLC confirmed the loss of SQDG when *sqdB* is deleted (Fig. 2F) but ornithine lipids were not detectable,  
234 preventing their analysis using this method. Under photoheterotrophic conditions, growth of the strains  
235 unable to produce SQDG or ornithine lipids was indistinguishable from strains with unaltered lipid  
236 biosynthesis (see Materials and Methods) (Supplementary Fig. 1), and the UV/Vis/NIR spectra of isolated  
237 chromatophore membranes from these strains were also very similar (Supplementary Fig. 2). Therefore,  
238 removal of SQDG or ornithine lipids did not result in obvious phenotypes with respect to either growth or  
239 spectral features.

240

241

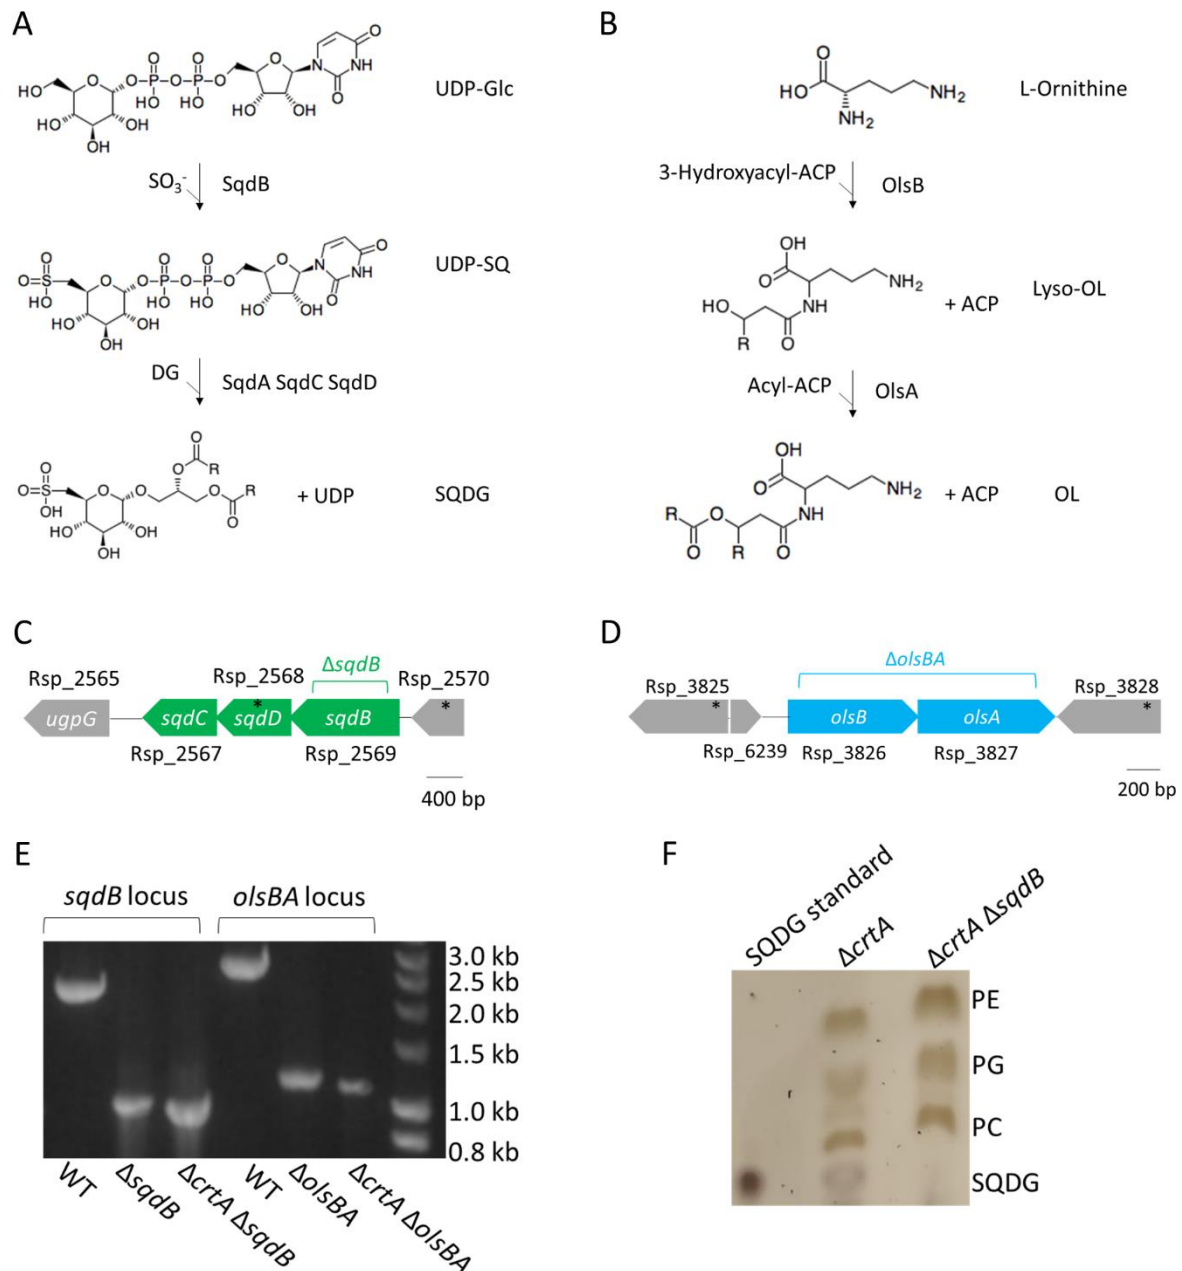

242

243 **Figure 2. Lipid biosynthesis pathways and deletion of *sqdB* and *olsBA* and PCR verification of knockout**  
 244 **strains.** (A) sulfoquinovosyl diacylglycerol (SQDG) is synthesised in two steps. The first step is the addition of  
 245 sulphite to UDP-glucose (UDP-Glc) to produce UDP-sulfoquinovose (UDP-SQ) by SqdB. Next, diacylglycerol is  
 246 added and UDP is removed by SqdA, C and D to produce SQDG [51]. (B) Ornithine lipids are synthesised by  
 247 the acyltransferases OlsB and OlsA, which sequentially add a 3-hydroxyacyl group then an acyl group to L-  
 248 ornithine using 3-hydroxyl-ACP and acyl-ACP as substrates, respectively [54]. (C) Structure of the *sqdBDC*  
 249 operon. The region labelled  $\Delta$ *sqdB* (encompassing Rsp\_2569) was removed to abolish SQDG biosynthesis. (D)  
 250 Structure of the *olsBA* operon. The labelled region spanning *olsB* (Rsp\_3826) and *olsA* (Rsp\_3827) was  
 251 removed to prevent OL biosynthesis. (E) Agarose gel of ethidium bromide-stained PCR products showing size  
 252 differences for the amplified regions spanning the *sqdB* and *olsBA* genes showing a clear reduction in size in  
 253 the knockout strains relative to the wild-type. (F) TLC plate showing loss of SQDG lipid in the  $\Delta$ *sqdB* strain. A  
 254 standard for SQDG was run in lane A and a band of the expected size can be seen in samples from  $\Delta$ *crtA* but  
 255 not in  $\Delta$ *crtA*  $\Delta$ *sqdB* confirming the loss of SQDG biosynthesis.

256

257

258 **The loss of SQDG prevents the formation of dimeric RC-LH1 core complexes**

259 The removal of SQDG in wild-type and  $\Delta crtA$  strains results in a complete loss of observable dimer formation,  
260 whereas the removal of ornithine lipids has no discernible effect upon the monomer to dimer ratio of RC-  
261 LH1 complexes (Fig. 3A-B). The absence of SQDG-free RC-LH1 dimers supports the assignment of SQDG in the  
262 cryo-EM structure and highlights the essential role of this lipid for RC-LH1 dimer formation in *Rba.*  
263 *sphaeroides*. The absence of dimers from a control strain known to only produce monomers, in which the  
264 PufX Arg49 and Arg53 residues that hydrogen-bond the SQDG headgroup are replaced with leucines [7,8,47],  
265 further supports the essential role of SQDG in dimer formation. The normal growth of the cells, and near-  
266 identical absorbance spectra of complexes from strains unable to produce SQDG and ornithine lipids  
267 (Supplementary Fig. 1 and Fig.3 C-D), suggests that RC-LH1 monomers are properly assembled without these  
268 lipids. Introducing *sqdB* to the  $\Delta sqdB$  strain on a replicative plasmid restores some formation of dimers, whilst  
269 introducing the complete *sqdBDC* operon fully restores dimer formation to WT levels (Supplementary Fig.  
270 5A). To test whether SQDG could induce dimerization of fully assembled monomeric complexes, we  
271 attempted to dimerise monomeric RC-LH1 complexes from the  $\Delta sqdB$  strain by the addition of SQDG. The  
272 monomer band harvested from a 20-25% discontinuous gradient of  $\Delta sqdB$  membranes was incubated with  
273 or without 0.05% w/v SQDG for 24 hrs, but no significant dimer formation was seen (Supplementary Fig.5B).  
274 The inability of exogenously added SQDG to induce dimerization suggests that this lipid has to be fully  
275 integrated during the *in vivo* assembly pathway, in order to create the wide range of interactions that stabilise  
276 the RC-LH1 dimer. These include a series of hydrogen bonds with the backbone of the RC-L subunit, the salt  
277 bridge complex with PufX Arg49 and Arg53, and hydrophobic contacts with the transmembrane region of the  
278 opposing LH1 $\beta$ 1 subunit and the BChl1 macrocycle on the other side of the complex [8].

279 To test whether SQDG and ornithine lipids affect RC-LH1 activity *in vitro*, we monitored the light-driven  
280 oxidation rate of cytochrome  $c_2$  by monomeric and dimeric complexes in the presence of ubiquinone-2 (an  
281 analogue of the native substrate, ubiquinone-10, with a shortened isoprene tail). In monomeric RC-LH1  
282 complexes from the wild-type background, there was no significant difference in turnover rates between the  
283  $\Delta sqdB$  and  $\Delta olsBA$  mutants and equivalent complexes with both lipids, demonstrating no impairment of  
284 assembly or function in the absence of either lipid (Fig. 3F). Therefore, we can conclude that whilst deletion  
285 of *sqdB* and therefore removal of SQDG biosynthesis precludes dimer formation, there is no functional effect  
286 on the monomeric complex.

287

288 **The absence of proteins Y and Z does not prevent dimer formation.**

289 As the *puyA* ORF (Rsp\_7571) encoding protein-Y is isolated in the genome, we were able to excise it without  
290 disturbing upstream or downstream genes, leaving behind a sequence encoding 6 residues in the genome of

291 the unmarked  $\Delta puyA$  strain. The gene encoding protein-Z is located within the Rsp\_2385 open reading frame  
292 on chromosome 1 (1014511-1014819) but is transcribed in the opposite direction [8]. Most of this gene was  
293 deleted to make a  $\Delta puzA$  strain, with just the sequence encoding 7 residues left intact in the genome.

294 Rate-zonal centrifugation of solubilised chromatophores from these strains show the removal of neither  
295 protein-Y nor protein-Z prevents the formation of dimers (Fig.3. A-B). Absorption spectra of each monomer  
296 band shows a small but distinct decrease in absorbance at 873 nm in strains lacking protein-Y (Fig 3. C). This  
297 observation agrees with the finding that the absence of protein-Y results in monomers missing some  $\alpha$  and  
298  $\beta$  LH1 polypeptides, thus they have fewer BChls per RC [9,10]. The dimer bands all have near-identical  
299 UV/Vis/NIR spectra, suggesting all dimers contain the same number of  $\alpha$  and  $\beta$  polypeptides. The monomer  
300 to dimer ratio is similar to wild type in strains lacking either protein-Y or protein-Z, which appear to have no  
301 significant role in dimer formation.

302 Activity assays show that the rate of cytochrome  $c_2$  oxidation by wild-type RC-LH1 monomers and dimers are  
303 almost identical, and that rates for both oligomeric forms of the  $\Delta puyA$  RC-LH1 complex are similar, even  
304 when accounting for the slight reduction of absorbance at 873 nm (Fig 3E). The activity of the monomeric  
305 complexes from the  $\Delta puzA$  strain were found to be similar to the monomeric wild-type complexes, but the  
306 activity of the dimeric complexes lacking protein-Z was slightly reduced ( $p = 0.03$ ), suggesting it may have a  
307 small, but not essential, functional role exclusive to the dimer (Fig. 3E).

308

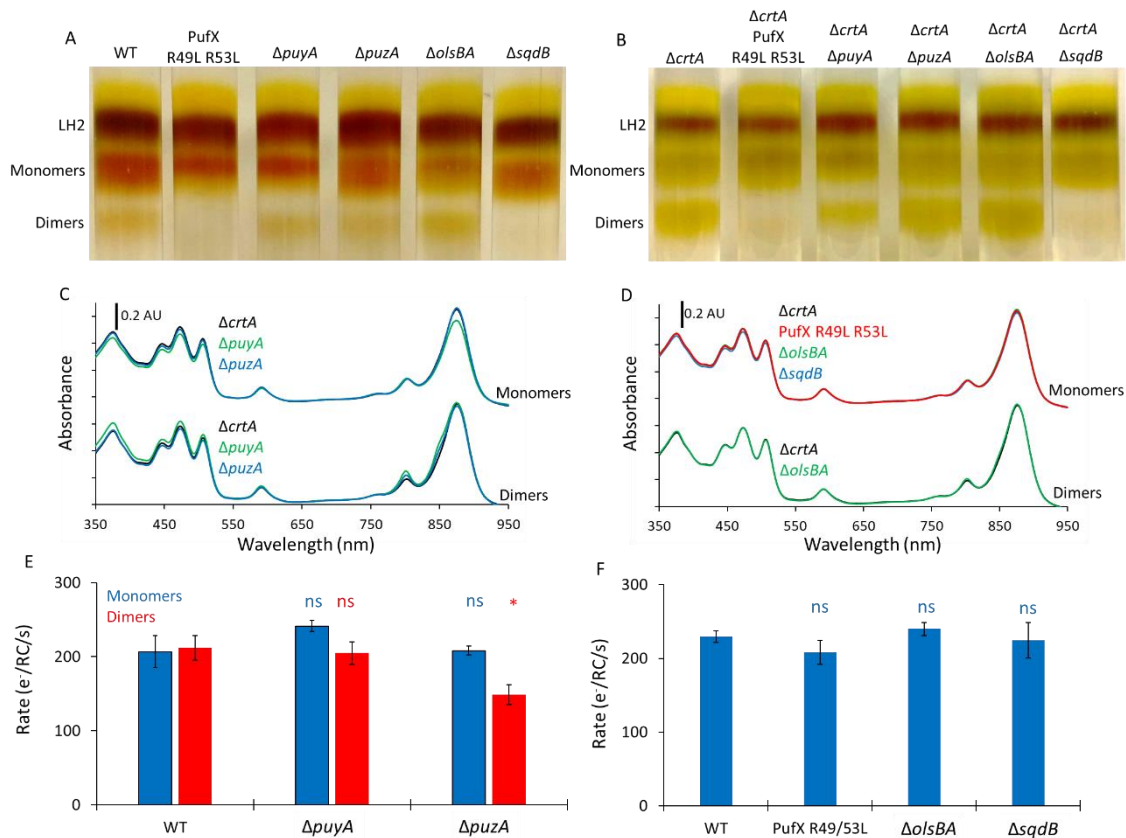

309

310 **Figure 3. The effects of removing protein-Y, protein-Z, SQDG or ornithine lipids on RC-LH1 dimer formation,**  
 311 **absorbance spectra and RC activity.** (A-B) Solubilised chromatophore membranes separate into bands of  
 312 LH2, RC-LH1 monomer and RC-LH1 dimer when centrifuged on sucrose step gradients. Panel A shows the  
 313 wild-type strain (WT), a control strain that does not produce dimeric RC-LH1 (PufX R49L R53L), a strain lacking  
 314 protein-Y ( $\Delta puyA$ ), a strain lacking protein-Z ( $\Delta puzA$ ), a strain that cannot produce ornithine lipids ( $\Delta olsBA$ ),  
 315 and a strain that cannot produce SQDG lipids ( $\Delta sqdB$ ). Panel B shows sucrose gradients for the strains in (A)  
 316 in a background that is also deficient in the *crtA* gene encoding spheroidene monooxygenase ( $\Delta crtA$ ). (C-D)  
 317 UV/Vis/NIR absorbance spectra of the monomer and dimer RC-LH1 bands harvested from the gradients in  
 318 (B). Panel C shows spectra for the  $\Delta crtA$  strain, and those also harbouring the  $\Delta puyA$  and  $\Delta puzA$   
 319 mutations. Panel D shows spectra for the  $\Delta crtA$  strain, and strains also harbouring the RC-LH1 dimer-deficient PufX R49L  
 320 R53L mutations, and the  $\Delta olsBA$  and  $\Delta sqdB$  genes. (E) Turnover assays for monomeric and dimeric complexes  
 321 from the WT, and strains lacking proteins Y and Z in strains also lacking *CrtA*. (F) Turnover assays for the  
 322 monomeric WT, PufX R49L R53L monomeric control, and monomeric lipid-deficient mutants produced in the  
 323 wild-type background strain. Rates in E-F show moles of  $cyt\ c_2$  oxidised per second per mole of RC during  
 324 illumination using an 810 nm LED of a solution containing 0.01 (E) or 0.05 (F)  $\mu M$  RC-LH1 and 5  $\mu M$   $cyt\ c_2$ . T-  
 325 tests were performed relative to rates for monomeric or dimeric WT complexes where \* denotes a p value  
 326 from 0.01-0.05 and ns denotes a p value > 0.05.

327

328

329

330



331

332 **SQDG, PufX, protein-Y and protein-Z in other *Rhodobacter* species**

333 Aligning PufX sequences shows that the two arginine residues that bind SQDG, Arg49 and Arg53, are  
334 universally conserved amongst the *Rhodobacter* species within the *Cereibacter* subgroup (Fig.5). All of these  
335 species also contain the genes for SQDG biosynthesis (*SqdBDC*), suggesting RC-LH1 complexes in these  
336 species may form dimers with PufX and SQDG in a similar way to *Rba. sphaeroides*. It has been observed that  
337 *Rba. azotoformans* and *Rba. changelensis* form dimeric RC-LH1 complexes, but this has yet to be verified for  
338 other members of the *Cereibacter* sub-group [55]. The Arg residues are not conserved beyond the *Cereibacter*  
339 group and a BLAST search for either *sqdB*, *C* or *D* in the species lacking the PufX Arg residues found no results.  
340 We would not expect species with monomeric RC-LH1 complexes to require SQDG, but it is interesting to  
341 note that there are two species with dimeric RC-LH1 (*Rhodobaca bogoriensis* [56] and *Rba. blasticus* [57])  
342 that contain neither the Arg49 and Arg53 residues in PufX nor the genes for SQDG biosynthesis. Further  
343 exploration is required to see if a different lipid, perhaps with a different mode of binding to PufX, is fulfilling  
344 the role of SQDG in dimerization.

345 We identified sequences for protein-Y in all species within the *Cereibacter* subgroup, and they have extremely  
346 high sequence homology that exceeds 94%, except for *Rba. changlensis*, where this value is only 38% (see  
347 Fig 4. and Fig. S6 for gene alignments). Protein-Z could also be found in all species in the *Cereibacter* subgroup  
348 except for *Rba. changlensis*. The fact that the *Rba. changlensis* PufX sequence is also distinct from the rest of  
349 the *Cereibacter* subgroup, and its clear separation in phylogenetic trees generated by its 16S RNA (Fig.4),  
350 indicates it may be a more distant relative of *Rba. sphaeroides*. We also note that sequence homology was  
351 quite high in the first 30 residues of protein-Z, corresponding with the 31 residues resolved in the cryo-EM  
352 structure [8], but very low in the rest of the sequence, suggesting function is limited to the N-terminus.

353 Sequences with homology to *Rba. sphaeroides* protein-Y and protein-Z were not found outside of the  
354 *Cereibacter* subgroup. It may be that if proteins are fulfilling the same role, they are not similar enough to be  
355 found through searches using sequence homology. This may be the case for the RC-LH1 complex from  
356 *Rhodobaca bogoriensis*; structural analysis reveals a protein in a position similar to that adopted by protein-  
357 Y in *Rba. sphaeroides* [58], but the DNA sequence identified in the paper bears no homology to *Rba.*  
358 *sphaeroides puyA*.

359

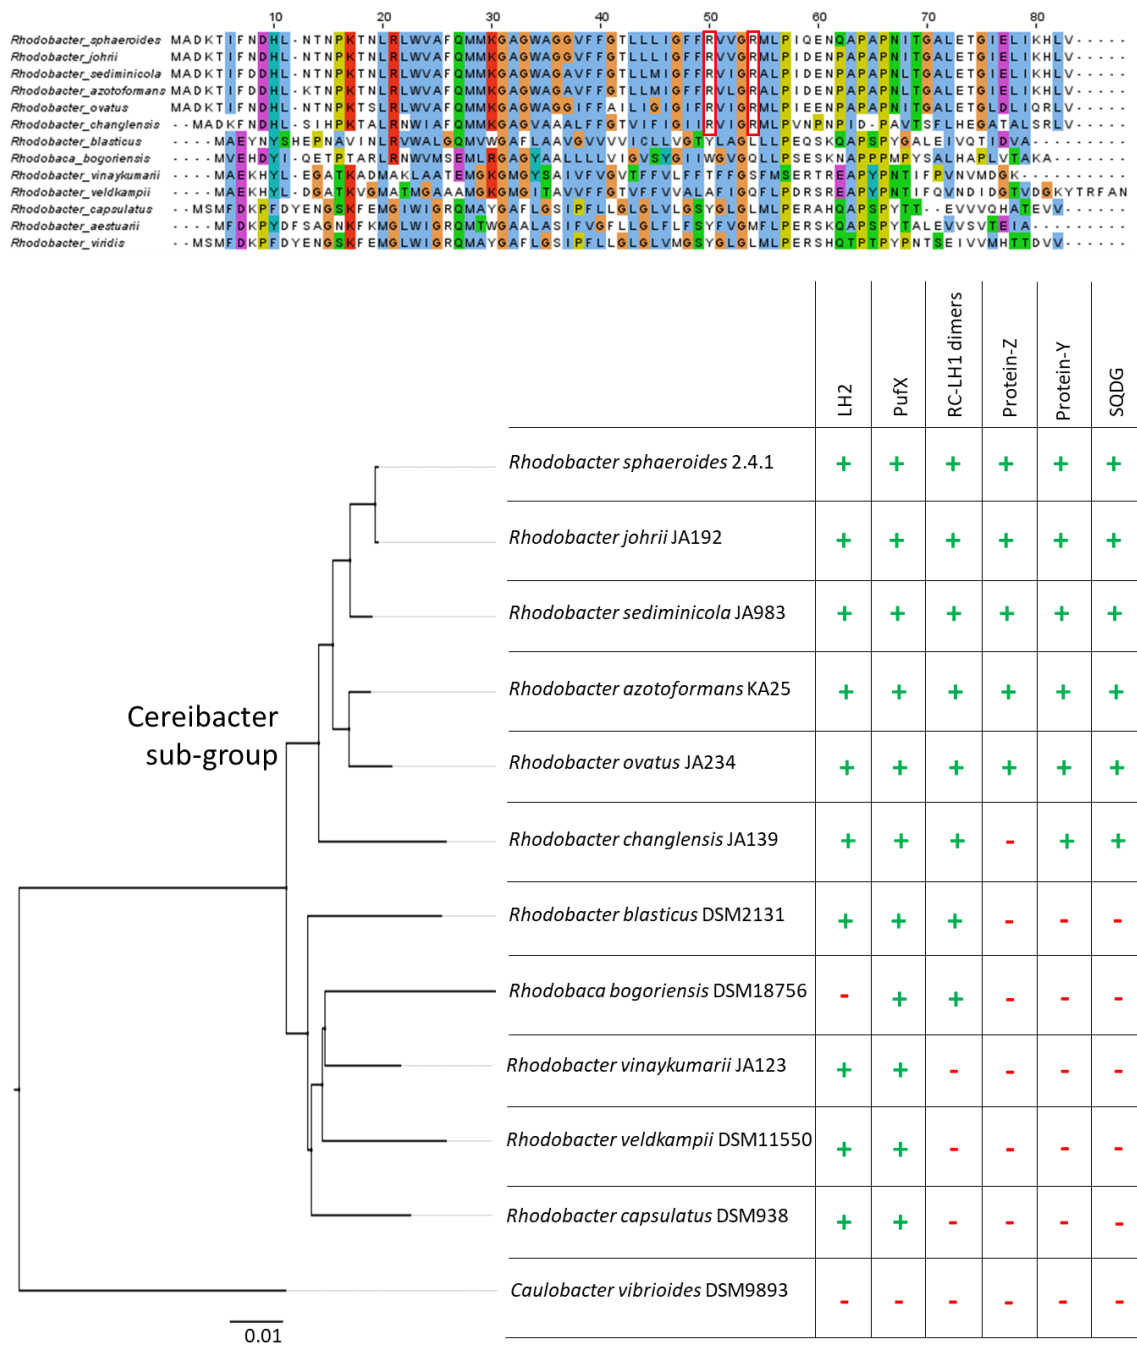

360

361

362 **Figure 4. Phylogenetic analysis of the requirements for RC-LH1 dimer formation.** (A) Sequence alignment of  
 363 PufX polypeptides. Red outlined boxes indicate the two arginine residues that bind SQDG in *Rba. sphaeroides*.  
 364 (B) Left - 16S phylogenetic tree of species that produce PufX for *Rhodobacter* species, and other members of  
 365 the *Rhodobacterales* order for which the oligomeric state of their RC-LH1 complex is known. The root of the  
 366 *Cereibacter* subgroup is labelled. *Caulobacter vibrioides*, a non-photosynthetic alphaproteobacterium, is  
 367 included as an outgroup to root the tree. Right – A table showing the presence or absence of genes encoding  
 368 the LH2 complex, PufX, protein-Y and protein-Z, whether the species produces dimeric RC-LH1 complexes,  
 369 and whether it produces SQDG as inferred by the presence of the *sqdB* gene. Green + symbols indicate  
 370 presence of a feature and red – symbols indicate its absence.

371

## 372 Discussion

### 373 The role of PufX, SQDG and OL in RC-LH1 dimer formation and cellular function

374 PufX has long been known as a unique component of the RC-LH1 complexes of *Rhodobacter* species [24]. In  
375 species that produce dimeric forms of the RC-LH1 complex (recently renamed to *Cereibacter* [44]), PufX is  
376 essential for mediating the interaction between pairs of RC-LH1 complexes to form the S-shaped dimers [8–  
377 10,23,41,59]. As such, PufX has been the subject of intense investigation to understand how and why certain  
378 forms of this polypeptide drive RC-LH1 dimer formation whilst others from closely related species do not  
379 [55]. Various elements of PufX have been investigated as potential points of contact between monomers,  
380 including a conserved GxxxG motif [27,60], the N-terminal 12 amino acids [26], and a pair of Arg residues at  
381 positions 49 and 53 (*Rba. sphaeroides* numbering) that are unique to those PufX polypeptides in dimer  
382 forming species [47]. It was not until the determination of high-resolution structures of RC-LH1 dimers that  
383 the structure of PufX was modelled with sufficient detail to elucidate the interactions that bring the two RC-  
384 LH1 monomers together [8–10]. These structures revealed that the N-terminal 15 amino acids were  
385 unresolvable, presumably because they are disordered in the mature complex and only required during  
386 dimer assembly. Additionally, a short “LWVAF” motif was observed close to the cytoplasmic surface of the  
387 membrane that mediates a direct protein-protein interaction between the two PufX proteins. The GxxxG  
388 motif plays no role in bringing together opposing PufX polypeptides. The high-resolution structures also  
389 revealed that PufX residues 44-67 were found to bind to the luminal surface of the reaction centre L subunit.  
390 The large distance between Arg49 and Arg53 in one PufX and those in the opposing monomer was a  
391 surprising discovery because these residues are known to be essential for dimer formation. In strains where  
392 these Arg residues are replaced with other amino acids [47], including the  $\Delta pufX$  mutant strain we used to  
393 determine the structure of the monomeric complex [7], the formation of RC-LH1 dimers is abolished. Careful  
394 inspection of the cryo-EM map for the RC-LH1 dimer revealed density consistent with an SQDG lipid for which  
395 the head group was hydrogen bonded to R49 and R53. One of the hydrocarbon tails extends between PufX  
396 and the L-subunit within the RC-LH1 monomer, and the second tail extends across the dimer interface  
397 towards the opposing monomer [8] (Fig.1). The specific nature of the headgroup binding, which could not  
398 reasonably accommodate an alternative lipid, and the requirement for R49 and R53 for dimer formation led  
399 us to speculate that the SQDG lipid itself is essential for dimer formation. In this study, the observation that  
400 removing SQDG from *Rba. sphaeroides* membranes via disruption of the biosynthesis pathway confirms our  
401 hypothesis.

402 In contrast to our findings with SQDG, the removal of OL had no observable effect on dimer formation. This  
403 suggests that “lipid 2” (Fig.1 and Qian et al [8]) may not be an OL, or that the lipid bound in this position can  
404 be readily substituted for an alternative. Because the density was ambiguous, possibly because of more  
405 disorder for lipid 2 relative to SQDG, we are still unable to assign it reliably. We also cannot determine

406 whether lipid 2 is required for dimer formation. However, its close association with SQDG and its position in  
407 a cavity between RC-LH1 monomers would suggest that the presence of a lipid in this location plays an  
408 important role.

409 Surprisingly, removal of SQDG or OL had no observable effect on photosynthetic growth (Fig. S1) or on the  
410 activity of the RC-LH1 complexes (Fig. 3E-F). This is consistent with previous observations that disruption of  
411 dimer formation does not produce a discernible phenotype under laboratory conditions [47]. This finding  
412 also suggests that specific protein-SQDG or protein-OL interactions are not essential in other membrane  
413 protein complexes required for growth under photoheterotrophic conditions, although they may be  
414 important under other growth modes, as is the case for OL-deficient strains of *Rba. capsulatus* [50]. SQDG is  
415 abundant in whole chromatophore membranes and in the annular lipids of complexes extracted using  
416 styrene maleic-acid copolymer nanodiscs [17,61,62], so it appears that bound SQDG or OL can often be  
417 substituted with other lipids, with the clear exception of the SQDG at the RC-LH1 dimer interface. This is not  
418 the first example of essential, ordered lipids being present in RC-LH1 complexes. In most purple bacteria, RCs  
419 are known to bind a conserved cardiolipin, the disruption of which via mutation of interacting residues  
420 adversely effects RC thermostability [63–65]. There are also many lipids observed between the RC and LH1  
421 ring, many of which are common to all structurally resolved RC-LH1 complexes and interact via conserved  
422 residues on the RC and LH1  $\alpha$  subunits [13, 32]. Therefore, this study and those mentioned above highlight  
423 the important role of protein-lipid interactions, which are often unresolved in reported RC-LH1 structures.

#### 424 **The role of proteins Y and Z in dimer formation and RC turnover**

425 It had long been assumed that the RC-LH1 complexes of *Rba. sphaeroides* contained five unique proteins (RC-  
426 L, RC-M, RC-H, PufX, LH1  $\alpha$  and LH1  $\beta$ ), so the discovery of proteins-Y and -Z in the cryo-EM structures was  
427 unexpected [7–10]. Protein-Y was annotated as a hypothetical protein in the UniprotKB, whilst protein-Z was  
428 unannotated. Our immediate question was whether these newly discovered components of the complex are  
429 required for RC-LH1 dimer formation and photosynthetic growth of *Rba. sphaeroides*. Removal of protein-Z  
430 had no observable effect on dimer formation or on photoheterotrophic growth but did slightly lower the  
431 rates of *in vitro* cytochrome  $c_2$  oxidation by the dimeric complex ( $p=0.03$ ) (Fig.3B, Fig.S1 and Fig.3E). We note  
432 that these assays were only performed in triplicate under a single condition and so are not exhaustive, with  
433 further studies required to elucidate the full impact of removing protein-Z. However, these are beyond the  
434 scope of the current study.

435 The removal of protein-Y does not inhibit dimer formation, as indicated by the similar relative abundance of  
436 the monomeric and dimeric complexes (Fig. 3A,B). However, the spectra of the monomeric complex show a  
437 decrease of LH1 absorbance at 875 nm relative to RC absorbance at 803 and 760 nm, suggesting a lowered  
438 LH1 antenna size. Cao *et al* and Tani *et al* recently determined the structure of RC-LH1 lacking protein-Y and  
439 found that, whilst both monomer and dimer complexes still form, the final subunits of the LH1 antenna fail

440 to assemble or are dissociated during protein purification [9,10]. Our findings are consistent with the  
441 generation of the same complexes with a smaller LH1 antenna. Because protein-Y is distant from the dimer  
442 interface and does not interact with PufX or SQDG, it is reasonable that its removal does not affect the ability  
443 of the complex to form dimers. Photoheterotrophic growth of the strains unable to produce protein-Y was  
444 similar to the wild type, which suggests that the loss of four LH1 subunits has a negligible effect on light-  
445 harvesting under our laboratory conditions (Supplementary Fig 1). We previously suspected that protein-Y  
446 serves to maintain a channel for efficient quinone exchange, which seems at-odds with our *in vitro* assays.  
447 However, loss of the terminal LH1 subunits creates a larger opening in the LH1 ring, which may compensate  
448 for the loss of protein-Y at the expense of light-harvesting capacity. Such a loss of capacity would likely not  
449 influence growth rates under the illumination conditions used for our experiments.

450 In strains that lack protein-Z, activity of monomeric complexes was similar to the wild type, which was  
451 expected because monomeric RC-LH1 does not bind protein-Z [8]. However, the dimeric complexes that lack  
452 protein-Z had slightly lowered activity when compared to wild type dimers (Fig.3E). This suggests that  
453 protein-Z may act to ensure the quinone exit channel at the dimer interface is kept open by preventing the  
454 complex reverting to the closed state observed by Cao *et al* [9]. Despite the small reduction in activity in  
455 purified RC-LH1 dimers lacking protein-Z we could not find an effect on growth rates under our laboratory  
456 growth conditions (Supplementary Fig 1).

#### 457 **The evolution of RC-LH1 dimers is synergistic with the presence of SQDG, protein-Y and protein-Z**

458 To further elucidate the roles of SQDG, protein-Y and protein-Z in RC-LH1 dimer formation, we investigated  
459 the genomes of other bacteria capable of forming dimeric RC-LH1 complexes to see if they do so via the same  
460 mechanism. By searching the relevant databases, we found that the species reclassified into the *Cereibacter*  
461 group, all of which are either known to form dimers or we predict will form dimers, appear to contain the  
462 genes for SQDG biosynthesis, PufX with SQDG binding residues, protein-Y, and most contain protein-Z,  
463 whereas the *Rhodobacter* species that produce monomeric complexes do not appear to contain any of these  
464 components. Whilst the phylogenetic analysis we performed is not exhaustive, we are able to speculate that  
465 the formation of RC-LH1 dimers in the *Cereibacter* subgroup evolved with the ability to synthesise SQDG, and  
466 the evolution of a variant of PufX that could bind the lipid head group. Subsequently, protein-Y was recruited  
467 to maintain efficient quinone diffusion. Finally, protein-Z was recruited to lock the complete RC-LH1 dimer in  
468 its final conformational state. Exceptions to this are the dimeric RC-LH1 complexes from more distantly  
469 related *Rhodobaca bogoriensis* and *Rba. blasticus*, which cannot produce SQDG and appear to be more  
470 closely related to the monomer-producing *Rba. capsulatus* and *Rba. veldkampii* than the *Cereibacter*  
471 subgroup. At the time of writing the dimeric structure of the *Rhodobaca bogoriensis* complex is published as  
472 a preprint [58] and the coordinates are not available in the PDB. However, unlike *Rba. sphaeroides* its LH1 is



473 composed of 15 LH1 subunits and it does not produce LH2, so it may have achieved RC-LH1 dimer formation  
474 by a unique mechanism that warrants further investigation.

475

476 **Author contributions:** C.N.H, A.H. and D.J.K.S. conceived and supervised the study. E.C.M., A.G.M.B., T.W.R.,  
477 A.H. and D.J.K.S. performed the research. E.C.M., A.G.M.B., C.N.H., A.H. and D.J.K.S. wrote the manuscript.

478

479 **Funding:** A.G.M.B was supported by a University of Sheffield Faculty of Science PhD studentship awarded to  
480 C.N.H. C.N.H. acknowledges Synergy Award 854126 from the European Research Council, which partially  
481 supported E.C.M. A.H. acknowledges a Royal Society University Research Fellowship (award no.  
482 URF\R1\191548), which partially supported E.C.M. D.J.K.S. acknowledges start-up funding from the  
483 University of East Anglia.

484

#### 485 **References**

- 486 1 Tucker, J. D., Siebert, C. A., Escalante, M., Adams, P. G., Olsen, J. D., Otto, C., Stokes, D. L. and  
487 Hunter, C. N. (2010) Membrane invagination in *Rhodobacter sphaeroides* is initiated at curved  
488 regions of the cytoplasmic membrane, then forms both budded and fully detached spherical  
489 vesicles. *Mol. Microbiol.*, Blackwell Publishing Ltd **76**, 833–847.
- 490 2 Adams, P. G. and Hunter, C. N. (2012) Adaptation of intracytoplasmic membranes to altered light  
491 intensity in *Rhodobacter sphaeroides*. *Biochim. Biophys. Acta - Bioenerg.*, Elsevier **1817**, 1616–1627.
- 492 3 Noble, J. M., Lubieniecki, J., Savitzky, B. H., Plitzko, J., Engelhardt, H., Baumeister, W. and Kourkoutis,  
493 L. F. (2018) Connectivity of centermost chromatophores in *Rhodobacter sphaeroides* bacteria. *Mol.*  
494 *Microbiol.*, John Wiley & Sons, Ltd **109**, 812–825.
- 495 4 Cartron, M. L., Olsen, J. D., Sener, M., Jackson, P. J., Brindley, A. A., Qian, P., Dickman, M. J., Leggett,  
496 G. J., Schulten, K. and Hunter, C. N. (2014) Integration of energy and electron transfer processes in  
497 the photosynthetic membrane of *Rhodobacter sphaeroides*. *Biochim. Biophys. Acta - Bioenerg.* **1837**,  
498 1769–1780.
- 499 5 Swainsbury, D. J. K., Hawkings, F. R., Martin, E. C., Musiał, S., Salisbury, J. H., Jackson, P. J., Farmer, D.  
500 A., Johnson, M. P., Siebert, C. A., Hitchcock, A., et al. (2023) Cryo-EM structure of the four-subunit  
501 *Rhodobacter sphaeroides* cytochrome *bc<sub>1</sub>* complex in styrene maleic acid nanodiscs. *Proc. Natl.*  
502 *Acad. Sci.*, Proceedings of the National Academy of Sciences **120**, e2217922120.
- 503 6 Qian, P., Swainsbury, D. J. K., Croll, T. I., Castro-Hartmann, P., Divitini, G., Sader, K. and Hunter, C. N.

- 504 (2021) Cryo-EM Structure of the *Rhodobacter sphaeroides* Light-Harvesting 2 Complex at 2.1 Å.  
505 Biochemistry, American Chemical Society **60**, 3302–3314.
- 506 7 Qian, P., Swainsbury, D. J. K., Croll, T. I., Salisbury, J. H., Martin, E. C., Jackson, P. J., Hitchcock, A.,  
507 Castro-Hartmann, P., Sader, K. and Hunter, C. N. (2021) Cryo-EM structure of the monomeric  
508 *Rhodobacter sphaeroides* RC–LH1 core complex at 2.5 Å. Biochem. J. **478**, 3775–3790.
- 509 8 Qian, P., Croll, T. I., Hitchcock, A., Jackson, P. J., Salisbury, J. H., Castro-Hartmann, P., Sader, K.,  
510 Swainsbury, D. J. K. and Hunter, C. N. (2021) Cryo-EM structure of the dimeric *Rhodobacter*  
511 *sphaeroides* RC-LH1 core complex at 2.9 Å: the structural basis for dimerisation. Biochem. J. **478**,  
512 3923–3937.
- 513 9 Cao, P., Bracun, L., Yamagata, A., Christianson, B. M., Negami, T., Zou, B., Terada, T., Canniffe, D. P.,  
514 Shirouzu, M., Li, M., et al. (2022) Structural basis for the assembly and quinone transport  
515 mechanisms of the dimeric photosynthetic RC–LH1 supercomplex. Nat. Commun. **13**, 1977.
- 516 10 Tani, K., Kanno, R., Kikuchi, R., Kawamura, S., Nagashima, K. V. P., Hall, M., Takahashi, A., Yu, L.-J.,  
517 Kimura, Y., Madigan, M. T., et al. (2022) Asymmetric structure of the native *Rhodobacter*  
518 *sphaeroides* dimeric LH1–RC complex. Nat. Commun. **13**, 1904.
- 519 11 Sener, M., Strumpfer, J., Singharoy, A., Hunter, C. N. and Schulten, K. (2016) Overall energy  
520 conversion efficiency of a photosynthetic vesicle. Elife **5**, e09541.
- 521 12 Dahlberg, P. D., Ting, P.-C., Massey, S. C., Allodi, M. A., Martin, E. C., Hunter, C. N. and Engel, G. S.  
522 (2017) Mapping the ultrafast flow of harvested solar energy in living photosynthetic cells. Nat.  
523 Commun. **8**, 988.
- 524 13 Swainsbury, D. J. K., Qian, P., Hitchcock, A. and Hunter, C. N. (2023) The structure and assembly of  
525 reaction centre-light-harvesting 1 complexes in photosynthetic bacteria. Biosci. Rep. **43**,  
526 BSR20220089.
- 527 14 Crofts, A. R., Meinhardt, S. W., Jones, K. R. and Snozzi, M. (1983) The role of the quinone pool in the  
528 cyclic electron-transfer chain of *Rhodospseudomonas sphaeroides*: A modified Q-cycle mechanism.  
529 Biochim. Biophys. Acta **723**, 202–218.
- 530 15 Crofts, A. R. (2021) The modified Q-cycle: A look back at its development and forward to a functional  
531 model. Biochim. Biophys. Acta - Bioenerg., Elsevier B.V. **1862**.
- 532 16 Sarewicz, M., Pintscher, S., Pietras, R., Borek, A., Bujnowicz, Ł., Hanke, G., Cramer, W. A., Finazzi, G.  
533 and Osyczka, A. (2021) Catalytic Reactions and Energy Conservation in the Cytochrome *bc*<sub>1</sub> and *b<sub>6</sub>f*  
534 Complexes of Energy-Transducing Membranes. Chem. Rev., American Chemical Society **121**, 2020–

- 535 2108.
- 536 17 Swainsbury, D. J. K., Proctor, M. S., Hitchcock, A., Cartron, M. L., Qian, P., Martin, E. C., Jackson, P. J.,  
537 Madsen, J., Armes, S. P. and Hunter, C. N. (2018) Probing the local lipid environment of the  
538 *Rhodobacter sphaeroides* cytochrome *bc*<sub>1</sub> and *Synechocystis* sp. PCC 6803 cytochrome *b<sub>6</sub>f* complexes  
539 with styrene maleic acid. *Biochim. Biophys. Acta - Bioenerg.*, Elsevier **1859**, 215–225.
- 540 18 Vasilev, C., Swainsbury, D. J. K., Cartron, M. L., Martin, E. C., Kumar, S., Hobbs, J. K., Johnson, M. P.,  
541 Hitchcock, A. and Hunter, C. N. (2022) FRET measurement of cytochrome *bc*<sub>1</sub> and reaction centre  
542 complex proximity in live *Rhodobacter sphaeroides* cells. *Biochim. Biophys. Acta - Bioenerg.* **1863**,  
543 148508.
- 544 19 Singharoy, A., Barragan, A. M., Thangapandian, S., Tajkhorshid, E. and Schulten, K. (2016) Binding  
545 Site Recognition and Docking Dynamics of a Single Electron Transport Protein: Cytochrome *c*<sub>2</sub>. *J. Am.*  
546 *Chem. Soc.*, American Chemical Society **138**, 12077–12089.
- 547 20 Singharoy, A., Maffeo, C., Delgado-Magnero, K. H., Swainsbury, D. J. K., Sener, M., Kleinekathöfer,  
548 U., Vant, J. W., Nguyen, J., Hitchcock, A., Isralewitz, B., et al. (2019) Atoms to Phenotypes: Molecular  
549 Design Principles of Cellular Energy Metabolism. *Cell* **179**, 1098-1111.e23.
- 550 21 Hitchcock, A., Hunter, C. N. and Sener, M. (2017) Determination of Cell Doubling Times from the  
551 Return-on-Investment Time of Photosynthetic Vesicles Based on Atomic Detail Structural Models. *J.*  
552 *Phys. Chem. B*, American Chemical Society **121**, 3787–3797.
- 553 22 Olsen, J. D., Martin, E. C. and Hunter, C. N. (2017) The PufX quinone channel enables the light-  
554 harvesting 1 antenna to bind more carotenoids for light collection and photoprotection. *FEBS Lett.*  
555 **591**, 573–580.
- 556 23 Qian, P., Papiz, M. Z., Jackson, P. J., Brindley, A. A., Ng, I. W., Olsen, J. D., Dickman, M. J., Bullough, P.  
557 A. and Hunter, C. N. (2013) Three-dimensional structure of the *Rhodobacter sphaeroides* RC-LH1-  
558 PufX complex: Dimerization and quinone channels promoted by PufX. *Biochemistry* **52**, 7575–7585.
- 559 24 Francia, F., Wang, J., Venturoli, G., Melandri, B. A., Barz, W. P. and Oesterhelt, D. (1999) The  
560 Reaction Center–LH1 Antenna Complex of *Rhodobacter sphaeroides* Contains One PufX Molecule  
561 Which Is Involved in Dimerization of This Complex. *Biochemistry*, American Chemical Society **38**,  
562 6834–6845.
- 563 25 Francia, F., Wang, J., Zischka, H., Venturoli, G. and Oesterhelt, D. (2002) Role of the N- and C-  
564 terminal regions of the PufX protein in the structural organization of the photosynthetic core  
565 complex of *Rhodobacter sphaeroides*. *Eur. J. Biochem.*, John Wiley & Sons, Ltd **269**, 1877–1885.

- 566 26 Ratcliffe, E. C., Tunncliffe, R. B., Ng, I. W., Adams, P. G., Qian, P., Holden-Dye, K., Jones, M. R.,  
567 Williamson, M. P. and Hunter, C. N. (2011) Experimental evidence that the membrane-spanning  
568 helix of PufX adopts a bent conformation that facilitates dimerisation of the *Rhodobacter*  
569 *sphaeroides* RC–LH1 complex through N-terminal interactions. *Biochim. Biophys. Acta - Bioenerg.*  
570 **1807**, 95–107.
- 571 27 Crouch, L. I., Holden-Dye, K. and Jones, M. R. (2010) Dimerisation of the *Rhodobacter sphaeroides*  
572 RC–LH1 photosynthetic complex is not facilitated by a GxxxG motif in the PufX polypeptide. *Biochim.*  
573 *Biophys. Acta - Bioenerg.* **1797**, 1812–1819.
- 574 28 Holden-Dye, K., Crouch, L. I. and Jones, M. R. (2008) Structure, function and interactions of the PufX  
575 protein. *Biochim. Biophys. Acta - Bioenerg.* **1777**, 613–630.
- 576 29 Swainsbury, D. J. K., Qian, P., Hitchcock, A. and Hunter, C. N. (2023) The structure and assembly of  
577 reaction centre-light-harvesting 1 complexes in photosynthetic bacteria. *Biosci. Rep.* **43**,  
578 BSR20220089.
- 579 30 Qian, P., Croll, T. I., Swainsbury, D. J. K., Castro-Hartmann, P., Moriarty, N. W., Sader, K. and Hunter,  
580 C. N. (2021) Cryo-EM structure of the *Rhodospirillum rubrum* RC–LH1 complex at 2.5 Å. *Biochem. J.*  
581 **478**, 3253–3263.
- 582 31 Yu, L.-J., Suga, M., Wang-Otomo, Z.-Y. and Shen, J.-R. (2018) Structure of photosynthetic LH1–RC  
583 supercomplex at 1.9 Å resolution. *Nature* **556**, 209–213.
- 584 32 Bracun, L., Yamagata, A., Christianson, B. M., Terada, T., Canniffe, D. P., Shirouzu, M. and Liu, L.-N.  
585 (2023) Cryo-EM structure of the photosynthetic RC-LH1-PufX supercomplex at 2.8-Å resolution. *Sci.*  
586 *Adv., American Association for the Advancement of Science* **7**, eabf8864.
- 587 33 Swainsbury, D. J. K., Qian, P., Jackson, P. J., Faries, K. M., Niedzwiedzki, D. M., Martin, E. C., Farmer,  
588 D. A., Malone, L. A., Thompson, R. F., Ranson, N. A., et al. (2021) Structures of *Rhodopseudomonas*  
589 *palustris* RC-LH1 complexes with open or closed quinone channels. *Sci. Adv., American Association*  
590 *for the Advancement of Science* **7**.
- 591 34 Jackson, P. J., Hitchcock, A., Swainsbury, D. J. K., Qian, P., Martin, E. C., Farmer, D. A., Dickman, M. J.,  
592 Canniffe, D. P. and Hunter, C. N. (2018) Identification of protein W, the elusive sixth subunit of the  
593 *Rhodopseudomonas palustris* reaction center-light harvesting 1 core complex. *Biochim. Biophys.*  
594 *Acta - Bioenerg.* **1859**.
- 595 35 Roszak, A. W., Howard, T. D., Southall, J., Gardiner, A. T., Law, C. J., Isaacs, N. W. and Cogdell, R. J.  
596 (2003) Crystal Structure of the RC-LH1 Core Complex from *Rhodopseudomonas palustris*. *Science*  
597 (80-. ). **302**, 1969–1972.

- 598 36 Xin, Y., Shi, Y., Niu, T., Wang, Q., Niu, W., Huang, X., Ding, W., Yang, L., Blankenship, R. E., Xu, X., et  
599 al. (2018) Cryo-EM structure of the RC-LH core complex from an early branching photosynthetic  
600 prokaryote. *Nat. Commun.* **9**, 1568.
- 601 37 Qi, C.-H., Wang, G.-L., Wang, F.-F., Xin, Y., Zou, M.-J., Madigan, M. T., Wang-Otomo, Z.-Y., Ma, F. and  
602 Yu, L.-J. (2023) New insights on the photocomplex of *Roseiflexus castenholzii* revealed from  
603 comparisons of native and carotenoid-depleted complexes. *J. Biol. Chem.* **299**, 105057.
- 604 38 Comayras, F., Jungas, C. and Lavergne, J. (2005) Functional consequences of the organization of the  
605 photosynthetic apparatus in *Rhodobacter sphaeroides* I. Quinone domains and excitation transfer in  
606 chromatophores and reaction center-antenna complexes. *J. Biol. Chem.* **280**, 11203–11213.
- 607 39 Timpmann, K., Chenchiliyan, M., Jalviste, E., Timney, J. A., Hunter, C. N. and Freiberg, A. (2014)  
608 Efficiency of light harvesting in a photosynthetic bacterium adapted to different levels of light.  
609 *Biochim. Biophys. Acta - Bioenerg.* **1837**, 1835–1846.
- 610 40 Qian, P., Bullough, P. A. and Hunter, C. N. (2008) Three-dimensional reconstruction of a membrane-  
611 bending complex: The RC-LH1-PufX core dimer of *Rhodobacter sphaeroides*. *J. Biol. Chem.* **283**,  
612 14002–14011.
- 613 41 Siebert, C. A., Qian, P., Fotiadis, D., Engel, A., Hunter, C. N. and Bullough, P. A. (2004) Molecular  
614 architecture of photosynthetic membranes in *Rhodobacter sphaeroides*: the role of PufX. *EMBO J.*  
615 **23**, 690–700.
- 616 42 Frese, R. N., Pàmies, J. C., Olsen, J. D., Bahatyrova, S., van der Weij-de Wit, C. D., Aartsma, T. J., Otto,  
617 C., Hunter, C. N., Frenkel, D. and van Grondelle, R. (2008) Protein shape and crowding drive domain  
618 formation and curvature in biological membranes. *Biophys. J.* **94**, 640–647.
- 619 43 Hsin, J., Gumbart, J., Trabuco, L. G., Villa, E., Qian, P., Hunter, C. N. and Schulten, K. (2009) Protein-  
620 induced membrane curvature investigated through molecular dynamics flexible fitting. *Biophys. J.*  
621 **97**, 321–329.
- 622 44 Hördt, A., López, M. G., Meier-Kolthoff, J. P., Schleuning, M., Weinhold, L.-M., Tindall, B. J., Gronow,  
623 S., Kyrpides, N. C., Woyke, T. and Göker, M. (2020) Analysis of 1,000+ Type-Strain Genomes  
624 Substantially Improves Taxonomic Classification of Alphaproteobacteria . *Front. Microbiol.* .
- 625 45 Tani, K., Kanno, R., Ji, X.-C., Hall, M., Yu, L.-J., Kimura, Y., Madigan, M. T., Mizoguchi, A., Humbel, B.  
626 M. and Wang-Otomo, Z.-Y. (2021) Cryo-EM Structure of the Photosynthetic LH1-RC Complex from  
627 *Rhodospirillum rubrum*. *Biochemistry, American Chemical Society* **60**, 2483–2491.
- 628 46 Walz, T., Jamieson, S. J., Bowers, C. M., Bullough, P. A. and Hunter, C. N. (1998) Projection structures



- 629 of three photosynthetic complexes from *Rhodobacter sphaeroides*: LH2 at 6 Å, LH1 and RC-LH1 at 25  
630 Å. *J. Mol. Biol.* **282**, 833–845.
- 631 47 Qian, P., Martin, E. C., Ng, I. W. and Hunter, C. N. (2017) The C-terminus of PufX plays a key role in  
632 dimerisation and assembly of the reaction center light-harvesting 1 complex from *Rhodobacter*  
633 *sphaeroides*. *Biochim. Biophys. Acta - Bioenerg.*
- 634 48 Sutherland, G. A., Qian, P., Hunter, C. N., Swainsbury, D. J. K. and Hitchcock, A. (2022) Engineering  
635 purple bacterial carotenoid biosynthesis to study the roles of carotenoids in light-harvesting  
636 complexes. In *Methods in Enzymology*, Academic Press.
- 637 49 Chi, S. C., Mothersole, D. J., Dilbeck, P., Niedzwiedzki, D. M., Zhang, H., Qian, P., Vasilev, C., Grayson,  
638 K. J., Jackson, P. J., Martin, E. C., et al. (2015) Assembly of functional photosystem complexes in  
639 *Rhodobacter sphaeroides* incorporating carotenoids from the spirilloxanthin pathway. *BBA -*  
640 *Bioenerg.*, Elsevier B.V. **1847**, 189–201.
- 641 50 Aygun-Sunar, S., Mandaci, S., Koch, H.-G., Murray, I. V. J., Goldfine, H. and Daldal, F. (2006) Ornithine  
642 lipid is required for optimal steady-state amounts of c-type cytochromes in *Rhodobacter capsulatus*.  
643 *Mol. Microbiol.*, John Wiley & Sons, Ltd **61**, 418–435.
- 644 51 Benning, C. and Somerville, C. R. (1992) Identification of an operon involved in sulfolipid  
645 biosynthesis in *Rhodobacter sphaeroides*. *J. Bacteriol.*, American Society for Microbiology **174**,  
646 6479–6487.
- 647 52 Hunter, C. N. and Turner, G. (1988) Transfer of genes coding for apoproteins of reaction centre and  
648 light-harvesting LH1 complexes to *Rhodobacter sphaeroides*. *J. Gen. Microbiol.* **134**, 1471–1480.
- 649 53 Huang, X., Vasilev, C., Swainsbury, D. J. K. and Hunter, C. N. (2024) Excitation energy transfer in  
650 proteoliposomes reconstituted with LH2 and RC-LH1 complexes from *Rhodobacter sphaeroides*.  
651 *Biosci. Rep.* BSR20231302.
- 652 54 Vences-Guzmán, M. Á., Geiger, O. and Sohlenkamp, C. (2012) Ornithine lipids and their structural  
653 modifications: from A to E and beyond. *FEMS Microbiol. Lett.* **335**, 1–10.
- 654 55 Crouch, L. I. and Jones, M. R. (2012) Cross-species investigation of the functions of the *Rhodobacter*  
655 PufX polypeptide and the composition of the RC-LH1 core complex. *Biochim. Biophys. Acta -*  
656 *Bioenerg.*, Elsevier B.V. **1817**, 336–352.
- 657 56 Semchonok, D. A., Chauvin, J.-P., Frese, R. N., Jungas, C. and Boekema, E. J. (2012) Structure of the  
658 dimeric RC–LH1–PufX complex from *Rhodobaca bogoriensis* investigated by electron microscopy.  
659 *Philos. Trans. R. Soc. B Biol. Sci.*, Royal Society **367**, 3412–3419.

- 660 57 Scheuring, S., Busselez, J. and Lévy, D. (2005) Structure of the Dimeric PufX-containing Core Complex  
661 of *Rhodobacter blasticus* by in Situ Atomic Force Microscopy. *J. Biol. Chem., Elsevier* **280**, 1426–  
662 1431.
- 663 58 Semchonok, D. A., Siponen, M. I., Tüting, C., Charras, Q., Kyrilis, F. L., Hamdi, F., Sadian, Y., Jungas, C.  
664 and Kastiris, P. L. (2022) Cryo-EM structure of the *Rhodobaca bogoriensis* RC-LH1-PufX dimeric  
665 complex at 2.9. bioRxiv, Cold Spring Harbor Laboratory.
- 666 59 Qian, P., Hunter, C. N. and Bullough, P. A. (2005) The 8.5 Å projection structure of the core RC-LH1-  
667 PufX dimer of *Rhodobacter sphaeroides*. *J. Mol. Biol.* **349**, 948–960.
- 668 60 Tunnicliffe, R. B., Ratcliffe, E. C., Hunter, C. N. and Williamson, M. P. (2006) The solution structure of  
669 the PufX polypeptide from *Rhodobacter sphaeroides*. *FEBS Lett.* **580**, 6967–6971.
- 670 61 Swainsbury, D. J. K., Scheidelaar, S., Van Grondelle, R., Killian, J. A. and Jones, M. R. (2014) Bacterial  
671 reaction centers purified with styrene maleic acid copolymer retain native membrane functional  
672 properties and display enhanced stability. *Angew. Chemie - Int. Ed.* **53**, 11803–11807.
- 673 62 Swainsbury, D. J. K., Scheidelaar, S., Foster, N., van Grondelle, R., Antoinette Killian, J. and Jones, M.  
674 R. (2017) The effectiveness of styrene—maleic acid (SMA) copolymers for solubilisation of integral  
675 membrane proteins from SMA-accessible and SMA-resistant membranes. *Biochim. Biophys. Acta -*  
676 *Biomembr.* **1859**, 2133–2143.
- 677 63 McAuley, K. E., Fyfe, P. K., Ridge, J. P., Isaacs, N. W., Cogdell, R. J. and Jones, M. R. (1999) Structural  
678 details of an interaction between cardiolipin and an integral membrane protein. *Proc. Natl. Acad.*  
679 *Sci. U. S. A., National Academy of Sciences* **96**, 14706–11.
- 680 64 Wakeham, M. C., Sessions, R. B., Jones, M. R. and Fyfe, P. K. (2001) Is There a Conserved Interaction  
681 between Cardiolipin and the Type II Bacterial Reaction Center? *Biophys. J., Elsevier* **80**, 1395–1405.
- 682 65 Fyfe, P. K., Isaacs, N. W., Cogdell, R. J. and Jones, M. R. (2004) Disruption of a specific molecular  
683 interaction with a bound lipid affects the thermal stability of the purple bacterial reaction centre.  
684 *Biochim. Biophys. Acta - Bioenerg.* **1608**, 11–22.
- 685  
686  
687  
688  
689

690 **Supporting information**

691 **Table S1. Primers used in this study.** Restriction enzyme sites used for cloning are underlined in bold.

| Name                  | Sequence (5'-3')                                    |
|-----------------------|-----------------------------------------------------|
| <i>olsBA</i> KO Scr F | CTTTCCGAGATCAGCGCCATCTC                             |
| <i>olsBA</i> KO UF    | GATC <b><u>GAATTC</u></b> CTGATAAGATCGTGACAGATGCGCG |
| <i>olsBA</i> KO UR    | GACAGGCTCGTCGGCGATCATTCCCGGAC                       |
| <i>olsBA</i> KO DF    | GATCGCCGACGAGCCTGTCGGCTGACCG                        |
| <i>olsBA</i> KO DR    | GATC <b><u>AAGCTT</u></b> GATCGAGAACCATGTGCTGATGGTC |
| <i>olsBA</i> KO Scr R | GATCGATCTCGAGATCTTCCCGGAC                           |
| <i>sqdB</i> KO Scr F  | CGGTGGGTGCCGACAAGAT                                 |
| <i>sqdB</i> KO UF     | GATC <b><u>GAATTC</u></b> GTGGCTGCCATCTGCCAT        |
| <i>sqdB</i> KO UR     | CCAATCAGGACACTGCGATGCGCATGAAGCC                     |
| <i>sqdB</i> KO DF     | CGCATCGCAGTGTCTGATTGGATCTGGCAG                      |
| <i>sqdB</i> KO DR     | GATC <b><u>AAGCTT</u></b> AACAGCCGGTCCACGTTT        |
| <i>sqdB</i> KO Scr R  | TCTCGTAGACATTCCGGCGCG                               |
| <i>puzA</i> KO Scr F  | CATTTCTGCATCATCGCGCATGAC                            |
| <i>puzA</i> KO UF     | CCG <b><u>GAATTC</u></b> GAAGCTGGACGAGATGTGGAATCC   |
| <i>puzA</i> KO UR     | CGTCAGACCTCTTTCATATATGCCATTTAAACCTCCCTCTTGC         |
| <i>puzA</i> KO DF     | GAGGTTTAAATGGCATATATGAAAGAGGTCTGACGGACCCGTG         |
| <i>puzA</i> KO DR     | CGGC <b><u>AAGCTT</u></b> CCATCGTTTTCTGCTTCCGTAC    |
| <i>puzA</i> KO Scr R  | GTTCGACGATGGACAGGATCTCG                             |
| <i>puyA</i> KO Scr F  | CAGCCGATGGTCCAGACCTC                                |
| <i>puyA</i> KO UF     | CCG <b><u>GAATTC</u></b> GTCACGATAATGGGCCATGTCTCTC  |
| <i>puyA</i> KO UR     | CAGTTGCTGTTTTCGGGCATGGTGCCTCCTTC                    |
| <i>puyA</i> KO DF     | CCATGCCCCAAAACAGCAACTGACGGCGC                       |
| <i>puyA</i> KO DR     | CGGC <b><u>AAGCTT</u></b> GAGGGCTGGATCGACTACGATC    |
| <i>puyA</i> KO Scr R  | GGCCTATGTCTCGGGGTTTCTC                              |
| <i>cycl</i> KO Scr F  | CATTTCTGTAATCCGTCCGAGATCG                           |
| <i>cycl</i> KO UF     | CCG <b><u>GAATTC</u></b> AACGTGAAGGTGATGCGTCAGG     |
| <i>cycl</i> KO UR     | CATTTAGCCCTCCAATCTCATGGTCTTCTCCCTTTGCG              |
| <i>cycl</i> KO DF     | GACCATGAGATTGGAGGGCTGAAATGCCTGTCTGC                 |
| <i>cycl</i> KO DR     | CTG <b><u>AAGCTT</u></b> GCCCACGTTCTCG              |
| <i>cycl</i> KO Scr R  | GCCACAGGATCTTGCCGTCATTG                             |
| <i>cycA</i> KO Scr F  | CATGGTGGTGAACCTGCAGGAC                              |
| <i>cycA</i> KO UF     | GCAG <b><u>GAATTC</u></b> CCTCGCATCTGCCGATACC       |
| <i>cycA</i> KO UR     | GGCGACCTGGGCCTTGACTTGGAACCTCATGG                    |
| <i>cycA</i> KO DF     | GTCAAGGCCAGGTGCGCGTCCGGC                            |
| <i>cycA</i> KO DR     | CGC <b><u>AAGCTT</u></b> GGCGCCTGAATGTACTCACCG      |
| <i>cycA</i> KO Scr R  | CTGAAGCAGGCGGTGTCGG                                 |
| <i>sqdB</i> HindIII F | GATC <b><u>AAGCTT</u></b> ATGCGCATCGCAGTTCTGG       |
| <i>sqdB</i> BcuI R    | GATC <b><u>ACTAGT</u></b> TCAGGACACCGAGCGCAG        |
| <i>sqdC</i> BcuI R    | GATC <b><u>ACTAGT</u></b> CTAAATCATGAGCGGCAGCGTTTG  |
| <i>sqdB</i> seq F     | GTTATCTCGACGTCTCGGTGCGAGAC                          |
| <i>sqdD</i> seq F     | GATTGGATCTGGCAGCCGAAGG                              |
| ECM 18                | CCTACACGCAAACCGTCGATTTAC                            |

PCR1 CGGGCCTCTTCGCTATT  
 PCR2 TTAGCTCACTCATTAGG

692

693

694

695

**Table S2. Plasmids used in this study.**

| Name                                   | Details                                                                              | Source/reference             |
|----------------------------------------|--------------------------------------------------------------------------------------|------------------------------|
| pk18mobsacB                            | Allelic exchange vector, Km <sup>R</sup>                                             | Professor J. Armitage*       |
| pk18mobsacB::Δ <i>olsBA</i>            | Construct for unmarked deletion of <i>olsBA</i>                                      | This study                   |
| pk18mobsacB::Δ <i>sqdB</i>             | Construct for unmarked deletion of <i>sqdB</i>                                       | This study                   |
| pk18mobsacB::Δ <i>puzA</i>             | Construct for unmarked deletion of <i>puzA</i>                                       | This study                   |
| pk18mobsacB::Δ <i>puyA</i>             | Construct for unmarked deletion of <i>puyA</i>                                       | This study                   |
| pk18mobsacB::Δ <i>cycA</i>             | Construct for unmarked deletion of <i>cycA</i>                                       | This study                   |
| pk18mobsacB::Δ <i>cycl</i>             | Construct for unmarked deletion of <i>cycl</i>                                       | This study                   |
| pBBRBB-Ppuf <sub>843-1200</sub> -DsRed | Replicative expression plasmid, Km <sup>R</sup>                                      | Addgene.org; Tikh et al 2014 |
| pBBRBB-Ppuf <sub>843-1200</sub> -cycA  | Plasmid for expression of <i>cycA</i>                                                | This study                   |
| pBBRBB-Ppuc-pucBAC                     | pBBRBB-Ppuf <sub>843-1200</sub> -DsRed with Ppuf-DsRED replaced with the Ppuc-pucBAC | This study                   |
| pBBRBB-Ppuc-sqdB                       | Plasmid for expression of <i>sqdB</i>                                                | This study                   |
| pBBRBB-Ppuc-sqdBDC                     | Plasmid for expression of <i>sqdBDC</i>                                              | This study                   |

696

\*Department of Biochemistry, University of Oxford, South Parks Road, Oxford OX1 3QU, U.K.

697

698

699

700

701

702

703

704

705

706

707

708

709

710

711

712

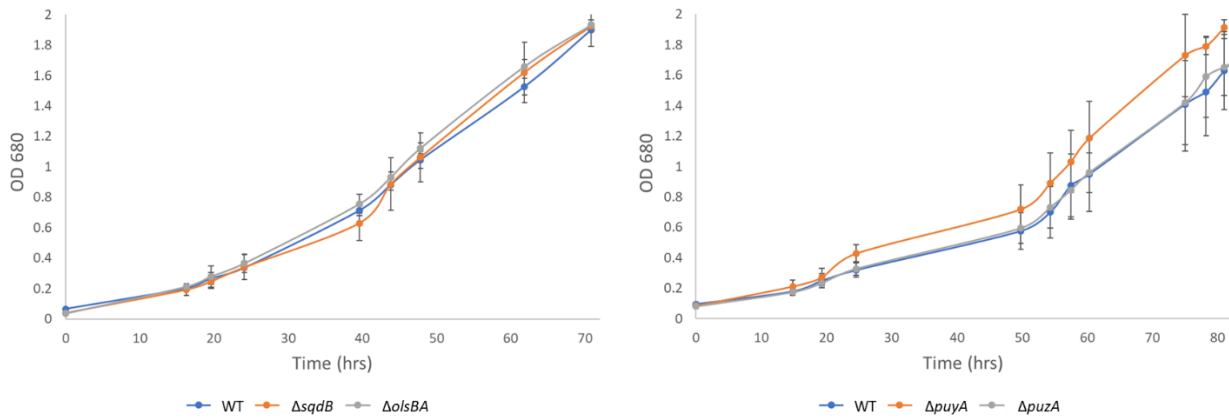

713

714 **Supplementary Figure 1.** Growth curves of all four knockouts in a WT background used in this study at low  
715 light (10umol). No significant phenotype was observed in any strain and all knockouts were confirmed by PCR  
716 afterwards.  $\Delta puyA$  showed some variation, but further repeats (data not shown) showed the same growth  
717 as WT. A phenotype may yet be apparent at different light intensities.

718

719

720

721

722

723

724

725

726

727

728

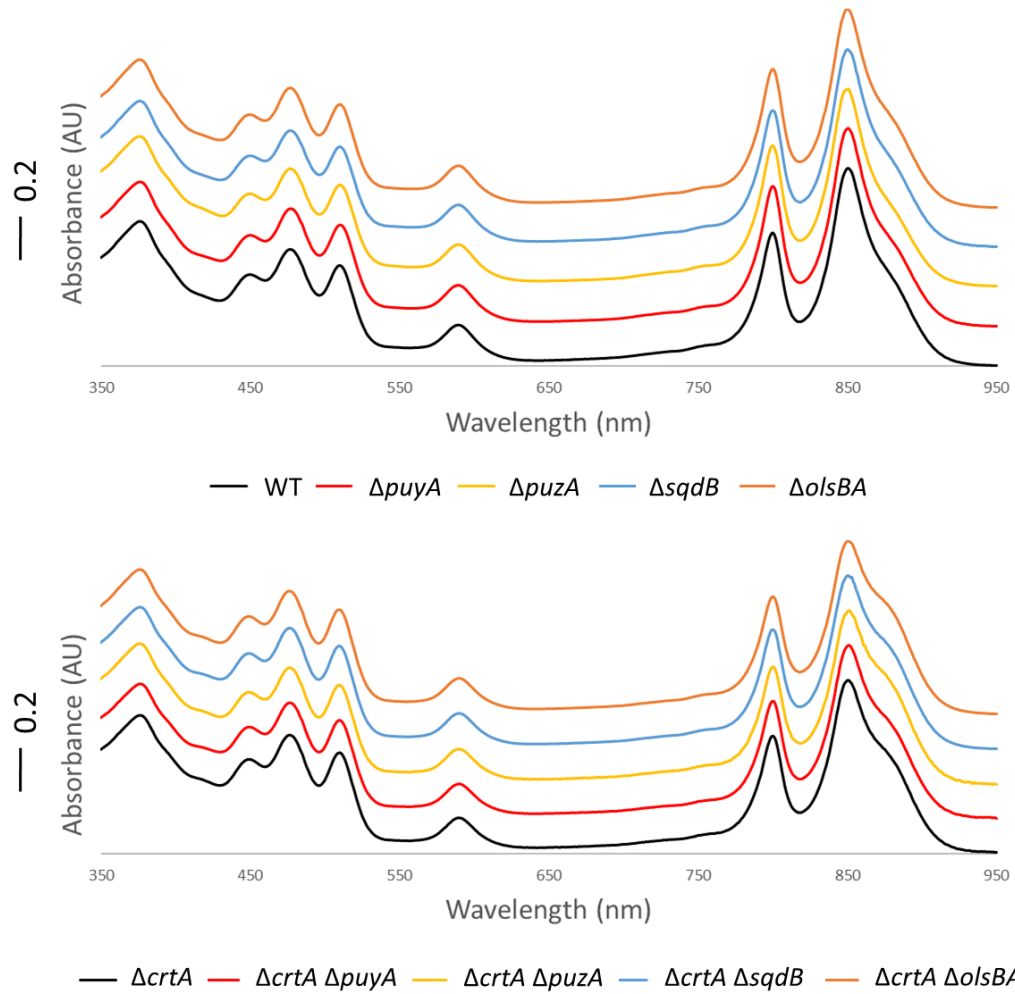

729

730

731 **Supplementary Figure 2. UV/Vis/NIR absorbance spectra of chromatophore membranes from all strains in**  
732 **the WT and  $\Delta CrtA$  backgrounds.** Spectra collected of chromatophore membranes isolated from other cellular  
733 components by differential centrifugation (see methods). Spectra are offset for clarity.

734

735

736

737

738

739

740

741



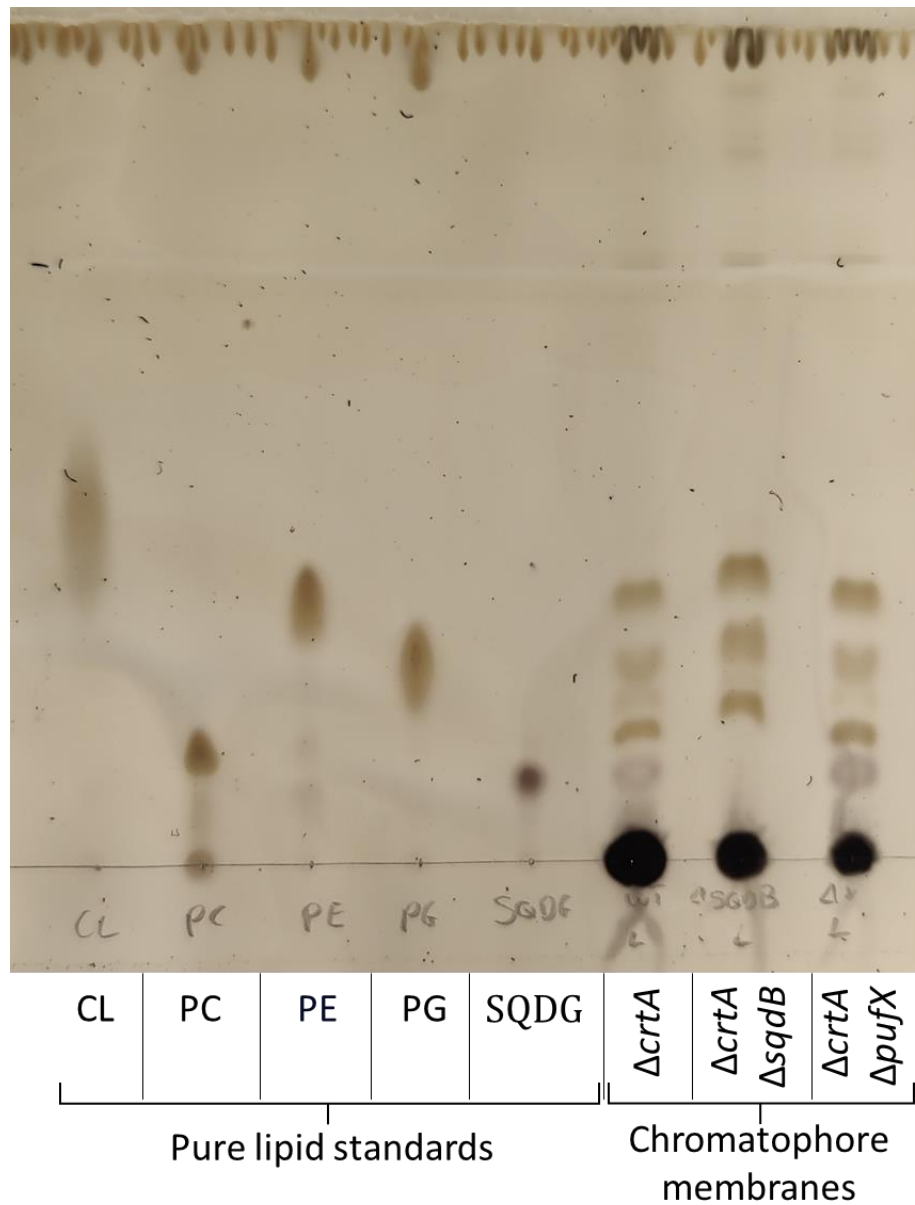

742

743 **Supplementary Figure 3. Full TLC plate showing pure lipid standards and lipids extracted from**  
744 **chromatophore membranes.** The lipid standards were Cardiolipin (CL), Phosphatidylcholine (PC),  
745 Phosphatidylethanolamine (PE), Phosphatidylglycerol (PG), Sulfoquinovosyl diacylglycerol (SQDG).  
746 Chromatophore membranes were extracted from *Rba. sphaeroides* cells and isolated by separation on 40/15  
747 % w/v sucrose gradients from the  $\Delta crtA$ ,  $\Delta crtA \Delta sqdB$ , and  $\Delta crtA \Delta pufX$  strains.

748

749

750

751

752

753

754

755

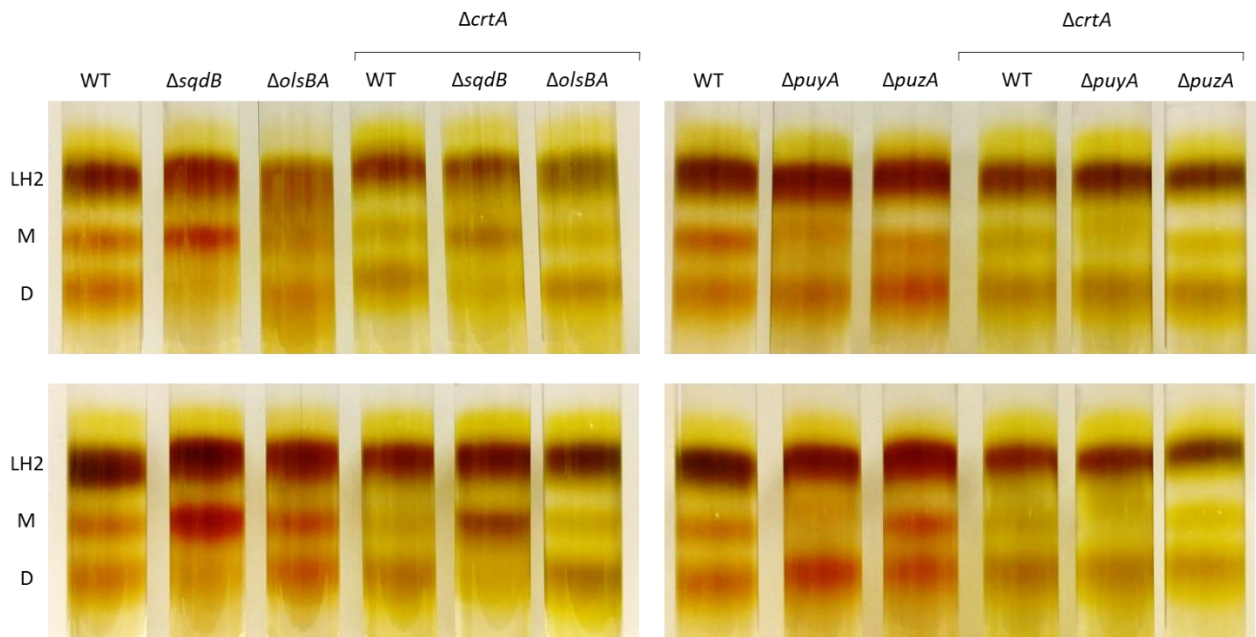

756

757

758 **Supplementary Figure 4.** Two further repeats were performed showing the same monomer dimer  
759 distribution as presented in Figure 3 of the main paper.

760

761

762

763

764

765

766

767

768

769

770

771

772

773

774

775

776

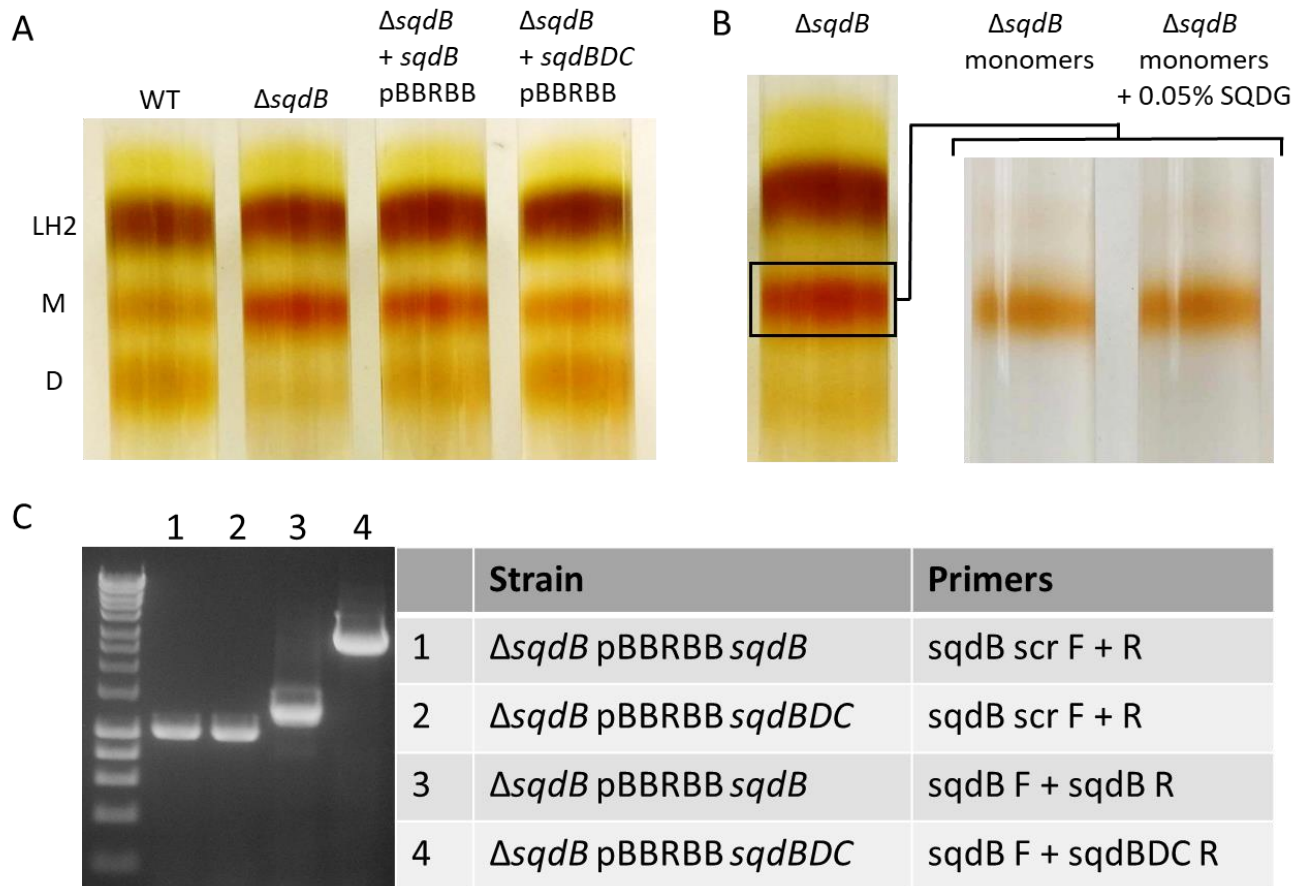

777

778

779 **Supplementary Figure 5. Attempted reconstitution of dimers in the  $\Delta sqdB$  strain by *in trans***  
 780 **complementation or incubation with SQDG.** (A) Monomer-dimer gradients of  $\Delta sqdB$  cells expressing *sqdB*  
 781 from a plasmid show a slight increase in dimer formation. Expression of the *sqdBDC* operon increases dimer  
 782 expression to WT levels. (B) Purified monomers from  $\Delta sqdB$  incubated with purified SQDG do not  
 783 spontaneously form dimers. (C) Ethidium bromide-stained PCR products to verify the presence of *sqdB* or  
 784 *sqdBDC* in pBRRBB-Ppuf<sub>843-1200</sub> in the  $\Delta sqdB$  background. Lanes 1 and 2 confirm the absence of *sqdB* in the  
 785 genome of both strains and lanes 3 and 4 confirm the presence of either *sqdB* or *sqdBDC* on pBRRBB.

786

787

788

789

790

A

```

      10      20      30      40      50      60
Rhodobacter_sphaeroides  . . . . . MPEVSEFAFR LMMAAVIFVGVGIMFAFAGGHWFVGLVVGGLVAAFFAATPNSN*
Rhodobacter_ovatus      MSAQLCIKEANVPEVSELAFLMMAAVIFVGVGIMFAFAGGHWFVGLVVGGLVAAFFAATPNSN*
Rhodobacter_johrii      . . . . . MPEVSEFAFR LMMAAVIFVGVGIMFAFAGGHWFVGLVVGGLVAAFFAATPNSN*
Rhodobacter_sediminicola . . . . . MPEVSELAFLMMAAVIFVGVGIMFAFAGGHWFVGMVVGGLVAALFAATPPKQ*
Rhodobacter_azotoformans . . . . . MPEVSELAFLMMAAVIFVGVGIMFAFAGGHWFVGMVVGGLVAALFAATPPKQ*
Rhodobacter_changlensis . . . . . MSELIWRLVMGTIIGLGFGLTVFGVAIGQLAVGWAVGLIVGCLFAATPVRR*
  
```

B

```

      10      20      30      40      50      60
Rhodobacter_sphaeroides  MAYMFGIIVFLAMLAVCWFGFMAAERQAGRLHAATARSDAEPAHGAATPSAHRDQSPAPAAHRDQ
Rhodobacter_ovatus      -MYFMMILVFLVALLALCWFGFMGTTTRQAGIHAPNRE--RAATPPA-----PAPGATTER
Rhodobacter_johrii      MATMFGIIVFLAMLAVCWFGYMAAERQANRLHLAAARTDAEPARS-----ASPAPAAHRDH
Rhodobacter_sediminicola MAYMLGILVFLGMLAVCWFGFMAAERRAGSTQLGMARRTTTEPHHTSST-----
Rhodobacter_azotoformans MSYMLGILVFLGMLAVCWFGFMAAERRSGSTQLGMARPKRASEPHQTSSASPAAGHSS-----AQ

      70      80      90      100     110     120
Rhodobacter_sphaeroides  AAAAGSSSAQRIMEADT-----STKAGESKAGSSAAGTSKE-----V-
Rhodobacter_ovatus      STS-----VEPAKPGPKPASPADNA*-----
Rhodobacter_johrii      APASQPSSTAQRIMEADT-----SAKAPDANAGSSGFKEV-----
Rhodobacter_sediminicola . . . . . PSPAPGPAASPAFNADAAAARPKPAVARSGDKPTEAV-
Rhodobacter_azotoformans STSASSTSAQSTSAAPS SPAHSPGPAAPSEPAADQAAGRSKPAEARTGDRPSQAS*
  
```

791

792

793 **Supplementary Figure 6.** (A) Alignment of sequences for protein-Y from species within the *Cereibacter*  
 794 subgroup. (B) Alignments for protein-Z. A sequence for *Rba. changlensis* could not be found, potentially due  
 795 to a lack of homology. With the exception of *Rba. changlensis*, protein-Y shows a very high degree of  
 796 sequence homology between species. protein-Z has a disordered tail on the C-terminus that is missing in the  
 797 structure and shows a very high degree of variation between species. Truncations would have to be  
 798 performed to establish if this region is unnecessary.

799
